1 **A fibronectin mechanotransduction pathway translates segmentation clock oscillations into**  
2 **periodic somite formation**

3

4

5

6

7 Patrícia Gomes de Almeida<sup>1,2,3</sup>, Pedro Rifes<sup>1,#</sup>, Ana Patrícia Martins-Jesus<sup>2,3</sup>, Gonçalo G. Pinheiro<sup>1,2</sup>,  
8 Raquel P. Andrade<sup>2,3,4,\*</sup> and Sólveig Thorsteinsdóttir<sup>1,\*,¶</sup>

9

10 <sup>1</sup> Centre for Ecology, Evolution and Environmental Change – cE3c, Departamento de Biologia  
11 Animal, Faculdade de Ciências, Universidade de Lisboa, 1740-016 Lisboa, Portugal

12 <sup>2</sup> Centre for Biomedical Research - CBMR, Universidade do Algarve, 8005-139 Faro, Portugal

13 <sup>3</sup> Algarve Biomedical Center, Campus Gambelas, Edifício 2. Ala Norte, 8005-139 Faro, Portugal

14 <sup>4</sup> Department of Medicine and Biomedical Sciences, Universidade do Algarve, 8005-139 Faro,  
15 Portugal

16

17 <sup>#</sup>Present address: The Novo Nordisk Foundation Center for Stem Cell Biology (DanStem), University  
18 of Copenhagen, 2200 Copenhagen N, Denmark

19

20 <sup>\*</sup>These authors contributed equally.

21 <sup>¶</sup>Correspondence to: Sólveig Thorsteinsdóttir ([solveig@fc.ul.pt](mailto:solveig@fc.ul.pt))

22 **Abstract:**

23 Somitogenesis starts with cyclic waves of expression of segmentation clock genes in the presomitic  
24 mesoderm (PSM) and culminates with periodic budding of somites in its anterior-most region. How  
25 cyclic clock gene expression is translated into timely morphological somite formation remains  
26 unclear. A posterior to anterior gradient of increasing fibronectin matrix complexity surrounds the  
27 PSM, suggesting that the mechanical properties of the matrix may play a role in regulating this  
28 transition. Here we interfered with the chick PSM fibronectin mechanotransduction pathway by  
29 perturbing (1) actomyosin-mediated contractility, (2) Rho-associated protein kinase function, (3)  
30 integrin-fibronectin binding and (4) fibronectin matrix assembly. Each treatment perturbed  
31 segmentation clock expression dynamics, *meso1* expression and resulted in defective somitic  
32 clefts. A model is presented where the fibronectin matrix gradient participates in the PSM  
33 wavefront of maturation by activating a mechanotransduction signaling cascade ensuring the  
34 correct spatio-temporal conversion of cyclic segmentation clock gene expression into periodic  
35 somite formation.

36

37 **Keywords:**

38 Fibronectin, Mechanotransduction, Segmentation Clock, Cleft Formation, Somitogenesis

39 **Introduction:**

40           Cells in the developing embryo are constantly receiving and integrating information,  
41 including tension-derived signals generated by the adhesion to neighboring cells and/or the  
42 surrounding extracellular matrix (ECM). Cell-surface integrins bind to ECM ligands in the  
43 extracellular space and connect the ECM to the intracellular actomyosin cytoskeleton through  
44 adaptor proteins (Campbell and Humphries, 2011; Wolfenson et al., 2013). These multimolecular  
45 complexes (i.e. focal adhesions) act as mechanotransduction centers allowing cells to perceive the  
46 chemical and physical properties of the ECM, such as its molecular composition, density and  
47 stiffness. While morphogens have been extensively studied as major chemical regulators of  
48 developmental processes (Marek and Kubíček, 1981; Slack, 1987; Tiedemann, 1976), the  
49 importance of mechanical forces in embryo development has, until recently, been largely  
50 overlooked (Chan et al., 2017; Merle and Farge, 2018). In fact, the ability of cells to sense and  
51 respond to mechanical signals has been shown to regulate critical developmental processes,  
52 including cell proliferation, migration and differentiation (Barriga et al., 2018; Cosgrove et al.,  
53 2016; Smutny et al., 2017; Wolfenson et al., 2016).

54           One of the most conspicuous morphogenetic events during early vertebrate  
55 embryogenesis is the formation of somites, which are the source of axial skeleton and skeletal  
56 muscle precursor cells (Christ et al., 2007). Somites are spheres of epithelioid cells and are formed  
57 periodically from the anterior portion of the mesenchymal presomitic mesoderm (PSM), bilateral  
58 to the axial structures (Bailey and Dale, 2015). Temporal control of somite formation is dependent  
59 on cyclic waves of expression of segmentation clock genes, many of which are targets of the Notch  
60 signaling pathway (Dequéant et al., 2006; Masamizu et al., 2006; Palmeirim et al., 1997). These  
61 waves periodically sweep the PSM in a posterior to anterior direction (Aulehla and Pourquié, 2010)  
62 and, as they reach the anterior PSM, oscillations first slow down and then arrest (Morimoto et al.,  
63 2005; Shih et al., 2015). The transcription factor *Mesp2/Meso1* is upregulated downstream of the  
64 segmentation clock in the anterior PSM, leading to Eph/Ephrin signaling and somitic cleft

65 formation (Barrios et al., 2003; Nakajima et al., 2006; Saga, 2012; Watanabe et al., 2009), followed  
66 by progressive cell rearrangements into a somite (Martins et al., 2009; Morimoto et al., 2005; Shih  
67 et al., 2015).

68 The PSM of vertebrate embryos is surrounded by a fibronectin-rich ECM, and both  
69 fibronectin and its integrin receptors are essential for somite formation (George et al., 1993;  
70 Georges-Labouesse et al., 1996; Goh et al., 1997; Jülich et al., 2005; Koshida et al., 2005; Kragtorp  
71 and Miller, 2007; Rifes et al., 2007; Takahashi et al., 2007; Yang et al., 1999, 1993). Moreover,  
72 perturbing fibronectin binding to its integrin receptors, by substituting the fibronectin RGD binding  
73 site with an RGE sequence (mouse *Fn1*<sup>RGE/RGE</sup>), causes dramatic somitogenesis defects (Girós et al.,  
74 2011; Takahashi et al., 2007). Indeed, fibronectin provides the structural support for cells to attach,  
75 polarize, change shape and position, required for somite epithelialization (Martins et al., 2009).

76 We have previously shown that the fibronectin matrix assembled around the chick PSM  
77 becomes progressively denser and more complex as the tissue matures (Rifes and  
78 Thorsteinsdóttir, 2012), and have proposed that this posterior to anterior gradient culminates in  
79 a fibronectin-dependent matrix assembly state that supports somite epithelialization in the  
80 anterior PSM (Rifes et al., 2007; Rifes and Thorsteinsdóttir, 2012). More recently, adhesion to a  
81 fibronectin substrate was noted as a regulator of *Lfng* oscillations in cultured mouse tailbud cells  
82 (Hubaud et al., 2017; Lauschke et al., 2013) and cell adhesion to fibronectin was linked to  
83 dampening and eventual arrest of *Lfng* oscillations (Hubaud et al., 2017), reminiscent of what is  
84 observed in the anterior PSM prior to somite formation. Nevertheless, how PSM cells sense and  
85 respond to an increasing fibronectin matrix complexity gradient, and how it affects segmentation  
86 clock oscillations *in vivo* remains unknown.

87 In this study, we addressed the involvement of the fibronectin ECM and its downstream  
88 mechanotransduction pathway in the regulation of both segmentation clock dynamics and  
89 subsequent somite formation *in vivo*, using the chick embryo as a model. We experimentally  
90 perturbed (1) non-muscle myosin II (NM II) ATPase activity (2), Rho-associated protein kinase

91 (ROCK), (3) integrin-fibronectin binding through RGD and (4) extracellular fibronectin matrix  
92 assembly, and found that all these treatments resulted in abnormal segmentation clock  
93 oscillations, mis-positioning of *meso1* expression in the rostral PSM and perturbations in somite  
94 morphogenesis. These results strongly suggest that tissue tension generated by the fibronectin  
95 matrix surrounding the PSM plays an important role in converting segmentation clock oscillations  
96 into periodic somite formation.

97

## 98 **Results:**

99 The intracellular mechanotransduction machinery of PSM cells regulates segmentation clock  
100 oscillations and *meso1* activation

101 In the chick embryo, sequential pairs of somites bud off from the anterior PSM every 90  
102 min, which corresponds to the period of segmentation clock oscillations (Figure 1 A). To investigate  
103 the involvement of intracellular actomyosin contractility in this process, the expression of the  
104 segmentation clock gene *hairy1* (Palmeirim et al., 1997), a target of Notch signaling, was analyzed  
105 in the PSM of embryo half explants cultured in the presence of either Blebbistatin, which directly  
106 inhibits the ATPase activity of NM II (direct inhibition) and consequently all actomyosin  
107 contractility, or RockOut (indirect inhibition), a chemical inhibitor of ROCK I and II (ROCK I/II)  
108 enzymes involved in activating NM II (Figure 1 B, C; Ringer et al., 2017; Straight et al., 2003; Yarrow  
109 et al., 2005). The contralateral control sides were cultured with an equal volume of DMSO.

110 Explants cultured for 6 hours in each experimental condition presented significantly  
111 altered *hairy1* expression. *hairy1* expression was either absent or in a different phase of the cycle  
112 relative to the contralateral control in 80% of the Blebbistatin- (n=7/9) and RockOut-treated  
113 explants (n= 8/10; Figure 1 D, a-c), suggesting that temporal control of *hairy1* oscillations requires  
114 the generation and transduction of tensional cues mediated by NM II and ROCK I/II activity.

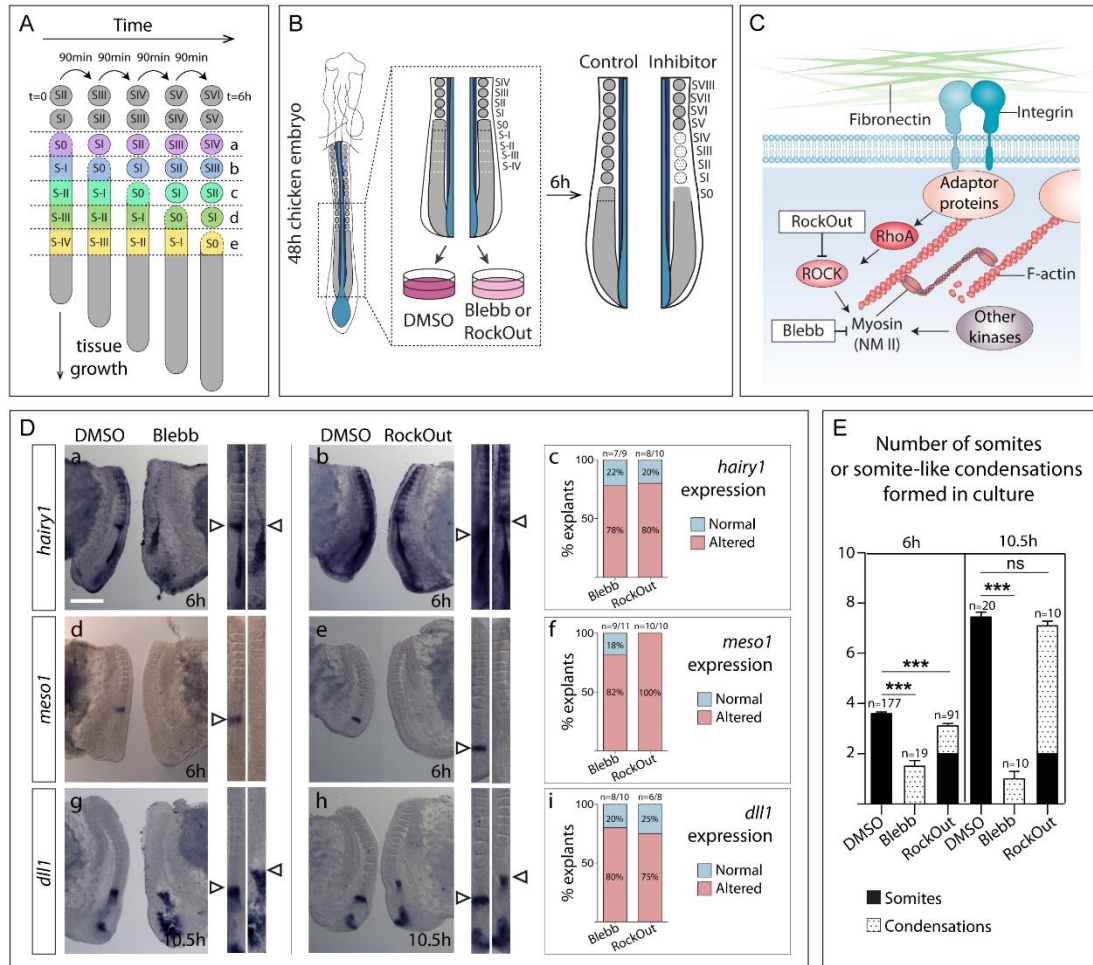

115

116 **Figure 1. Blocking NM II or ROCK I/II activity leads to misregulation of *hairy1*, *meso1* and *dll1* expression**  
 117 **and to defects in somite formation.**

118 **(A)** Schematic representation of chick PSM maturation and somite formation over time. A new pair of  
 119 somites buds off from the anterior PSM every 90 min. This is also the period of segmentation clock  
 120 oscillations in the chick embryo. With each new pair of somites, the previously formed somites mature (SI  
 121 becomes SII, SII becomes SIII, etc.). **(B)** Schematic representation of the explant culture system. Posterior  
 122 explants of HH11-14 chick embryos were bisected along the midline and cultured for 6 (or 10.5) hours. One  
 123 side of the explant was cultured with either Blebbistatin (Blebb) or RockOut, while the contra-lateral half  
 124 was cultured with an equal volume of DMSO. **(C)** Schematic representation of the action of Blebbistatin and  
 125 RockOut. Blebbistatin inhibits NM II ATPase activity directly while RockOut inhibits ROCK I/II-mediated  
 126 phosphorylation of myosin light chain, thus indirectly decreasing NM II ATPase activity. **(D)** *In situ*  
 127 hybridization for *hairy1* (a, b), *meso1* (d, e) and *dll1* (g, h) after 6 (a, b, d, e) or 10.5 hours of culture (g, h) in  
 128 Blebbistatin (Blebb; a, d, g) and in RockOut-containing (b, e, h) media. Straightened images of the respective  
 129 explant pairs (right) were aligned by SIV. Rostral is on top. Percentage of Blebbistatin- or RockOut-treated  
 130 explants with altered *hairy1*, *meso1* and *dll1* expression compared to the contralateral controls is shown in  
 131 c, f and i, respectively. **(E)** Number of somites (black bars) or somite-like condensations (dotted bars) formed  
 132 in cultured explants. Explants cultured with DMSO formed sharp somite boundaries and clearly  
 133 individualized somites. Blebbistatin-treated explants only formed 1-2 somite-like condensations. In RockOut  
 134 treated explants the first two somites were normal while the remaining ones were cell condensations with  
 135 poorly defined boundaries. ns – not significant, \*\*\* –  $p < 0.01$ . Scale bar in D: 500  $\mu$ m. Bars - standard error  
 136 of the mean.

137 Segmentation clock oscillations are required for the correct spatial and temporal  
138 upregulation of *Mesp2* in the anterior PSM (Niwa et al., 2011; Saga and Takeda, 2001; Sato et al.,  
139 2002), which regulates downstream targets required for the formation of the somitic cleft (Saga,  
140 2012). The expression of the chick *Mesp2* homolog, *meso1*, was altered in Blebbistatin- (n=9/11)  
141 and RockOut-treated explants (n=10/10; Figure 1 D, d-f). *meso1* expression was either absent,  
142 located more rostrally or presented a different number of bands of expression, clearly indicating  
143 that the normal cycles of activation and suppression of *meso1* in the rostral PSM were altered.  
144 Importantly, *meso1* expression was also perturbed after 3 hours in culture with Blebbistatin or  
145 RockOut (n=8/9 and 5/5, respectively; Supplementary Figure 1 A-B), corresponding to an effect  
146 within two segmentation clock cycles. Furthermore, timely downregulation of *dll1* in the anterior-  
147 most PSM (Palmeirim et al., 1998), which normally occurs downstream of *Meso1/Mesp2* activity  
148 (Takahashi et al., 2000; Takahashi et al., 2003), was not observed in either Blebbistatin- (80%,  
149 n=8/10) or RockOut-treated (75%, n=6/8) explants after 10.5h of culture (Figure 1 D, g-i). Together  
150 these data indicate that interfering with actomyosin contractility perturbs three sequential events:  
151 the spatio-temporal expression dynamics of *hairy1*, timely *meso1* expression and the  
152 downregulation of *dll1* expression in the anterior-most PSM.

153 Alterations in somite formation were observed concomitantly with the perturbations in  
154 *hairy1* and *meso1* expression. Control explants formed an average of 3.6 somites after 6 hours,  
155 consistent with a 90 min periodicity (Figure 1 E), while contralateral RockOut-treated explants  
156 formed 3.1 somites, of which only the first two somites were clearly individualized, while  
157 subsequent somite-like condensations were poorly defined (Figure 1 E). After 10.5 hours, control  
158 explants had formed an average of 7.5 somites, while RockOut-treated explants formed 7.1  
159 somites of which the first two appeared normal, but the remaining ones were ill-defined (Figure 1  
160 E). Importantly, explants cultured with Blebbistatin were unable to form more than 1-2 somite-  
161 like aggregates after 6 hours, or even 10.5 hours, of culture (Figure 1 E), evidencing an absolute

162 requirement for NM II ATPase activity in somite formation. These effects were not due to an  
163 increase in apoptosis (Supplementary Figure 2 A-D).

164 Our data reveal a previously unknown role for NM II- and ROCK I/II- mediated  
165 mechanotransduction in the temporal regulation of the segmentation clock, *meso1* expression,  
166 *dll1* downregulation and somite formation.

167

#### 168 NM II activity is required for somite cleft formation and cell polarization

169 Somite formation involves a mesenchymal-to-epithelial transition (MET) of anterior PSM  
170 cells (Martins et al., 2009; Saga, 2012). To determine to what extent this process is impaired upon  
171 NM II or ROCK I/II inhibition, we performed a detailed analysis of the morphology of S0 to SIII in  
172 explants after a 6 hour culture period (regions e-b in Figure 1 A).

173 In control explants, S0 showed apically enriched N-cadherin (Figure 2 A, D) and some  
174 *zonula occludens* protein 1 (ZO-1) accumulation was observed apically (Figure 2 B, D, arrowheads).  
175 Peripheral cell alignment occurred (Figure 2 C, D) and fibronectin matrix was detected in the  
176 nascent somitic clefts (Figure 2 E, F, arrows). In contrast, in explants cultured with Blebbistatin, N-  
177 cadherin was homogeneous (Figure 2 G, J), ZO-1 immunostaining was absent (Figure 2 H, J) and  
178 neither peripheral cell alignment (Figure 2 I, J) nor fibronectin matrix accumulation within the  
179 tissue was observed (Figure 2 K, L). Furthermore, the continuous and dense fibronectin matrix  
180 observed surrounding the rostral PSM and S0 in control explants was disrupted in Blebbistatin-  
181 treated explants (compare Figure 2 E and K, arrowheads). Moreover, the characteristic nuclear  
182 alignment and F-actin apical enrichment observed in control S1 (Supplementary Figure 3 A-C) was  
183 absent in Blebbistatin-treated explants and no signs of somitic boundaries could be detected  
184 (Supplementary Figure 3 D-F). We conclude that exposure of the S-IV and S-III regions of the PSM  
185 (regions e and d in Figure 1 A) to Blebbistatin for 6 hours completely blocks their capacity to form  
186 somites.



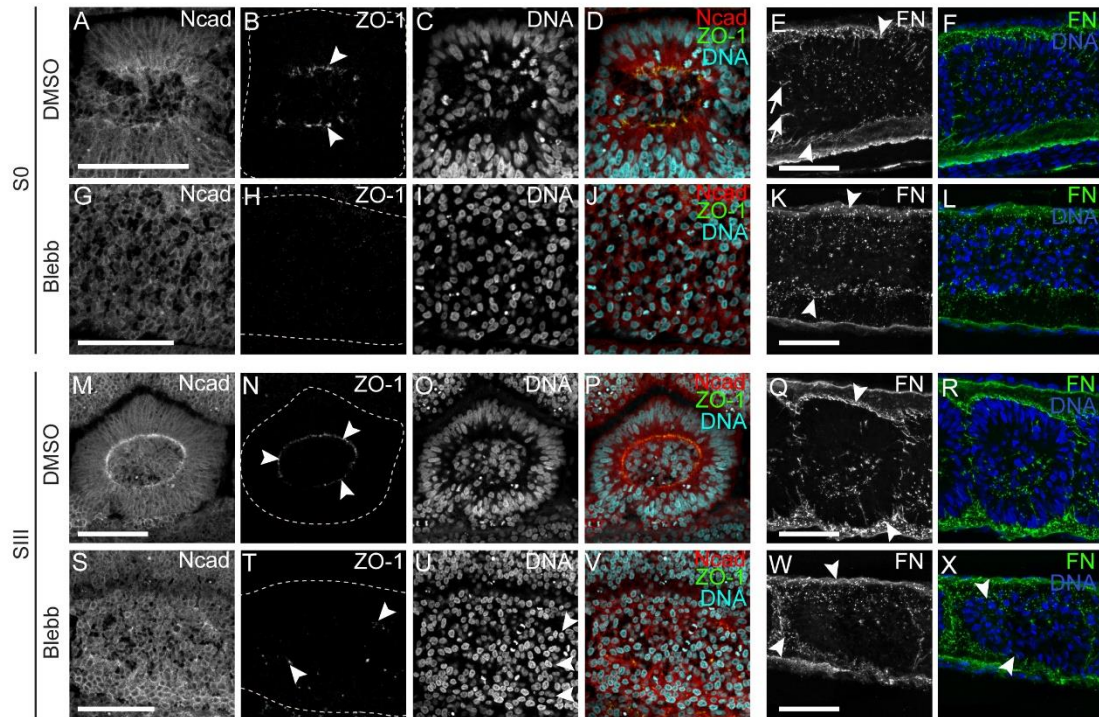

187  
188 **Figure 2. NM II inhibition abolishes N-cadherin and ZO-1 polarization and impairs fibronectin**  
189 **fibrillogenesis.**

190 (A-X) Sagittal views of control explants (A-F, M-R) and their Blebbistatin-treated contralateral halves after 6  
191 hours of culture, immunostained for N-cadherin (Ncad), ZO-1, fibronectin (FN), stained for DNA and imaged  
192 at S0 (A-L; region e in Figure 1 A) and SIII (M-X; region b in Figure 1 A) levels. S0 of DMSO-treated explants  
193 shows apically enriched N-cadherin (A) and ZO-1 (B, arrowheads) and peripheral nuclei are aligned (C, D),  
194 while no signs of polarized cell-cell adhesions (G, H) or nuclear alignment (I, J) are found in the contralateral  
195 Blebbistatin-treated explant. Apical polarization of N-cadherin and ZO-1 is maintained in SIII cells of DMSO-  
196 treated explants (M, N, arrowheads), but no polarized N-cadherin (S) or ZO-1 (T, arrowheads) are observed  
197 in contralateral Blebbistatin-treated halves. Nuclear alignment (U, arrowheads) and fibronectin assembly  
198 around somites (K, W, arrowheads) are also deficient in Blebbistatin-treated explants compared to  
199 contralateral controls (E, Q, arrowheads). Arrows in E show fibronectin assembly in the nascent somitic  
200 cleft. Rostral to the left and dorsal on top. Dashed lines mark borders of S0 (B, H) and SIII (N, T). FN –  
201 fibronectin. Ncad – N-cadherin. ZO-1 – *Zonula occludens 1*. Blebb – Blebbistatin. Scale bars: 50  $\mu$ m.

202

203 We next turned our attention to SII and SIII somites after 6 hours of culture. These were  
204 at stage S-II and S-I in the PSM, respectively (regions c and b in Figure 1 A), when the explants were  
205 placed in culture and had thus already upregulated *meso1* (Buchberger et al., 1998). As before, in  
206 the presence of Blebbistatin, apical enrichment of N-cadherin failed to occur (Figure 2 S, V), ZO-1  
207 was only detected in a few small foci (Figure 2 T, V) and, although a fibronectin matrix was present,  
208 it appeared less dense (Figure 2 W, X). An incipient nuclear alignment was sometimes observed  
209 (Supplementary Figure 3 K, arrowheads), but cells did not polarize their F-actin into apically

210 enriched adhesion belts (compare Supplementary Figure 3 G-I with J-L). Epithelial tissues other  
211 than somites (e.g. ectoderm and neural tube) did not present significant alterations after  
212 incubation with Blebbistatin (Supplementary Figure 4). Altogether, these results point to an  
213 indispensable role for NM II activity for the MET underlying somite formation.

214         RockOut-treated explants also showed perturbations in somite formation, although to a  
215 lesser extent (Figure 1 E). When compared to control explants (Figure 3 A-D; Supplementary Figure  
216 5 A-C), RockOut treatment resulted in incomplete somitic clefts, such that S0 shared the  
217 somitocoel with S1 and sometimes also with SII (Fig 3 E-H, arrows, Supplementary Figure 5 D-F,  
218 arrows). In contrast to the accumulation of fibronectin in the nascent clefts in controls (Figure 3 B,  
219 arrow), no fibronectin was observed in the incipient somitic clefts of RockOut-treated explants  
220 (Figure 3 F, arrows). These results suggest that ROCK I/II activity in the S-IV and S-III regions of the  
221 PSM is required for the formation of individualized somites. In contrast, when the rostral-most  
222 PSM (stage S-I before culture, region b in Figure 1 A) was exposed to RockOut for 6 hours, it was  
223 undistinguishable from control explants, showing apical accumulation of ZO-1 (Figure 3 I, M,  
224 arrowhead) and N-cadherin (Supplementary Figure 5, G, J), nuclear alignment (Figure 3, K, O,  
225 Supplementary Figure 5, H, K) and a complete, fibronectin matrix-containing cleft (Figure 3 J, N).  
226 This indicates that ROCK I/II activity is not required for S-I to develop into a somite.

227         Altogether, our data indicate that the intracellular mechanotransduction machinery of  
228 PSM cells is required for periodic somite cleft formation, and that ROCK I/II- independent NM II  
229 activity is essential for MET.

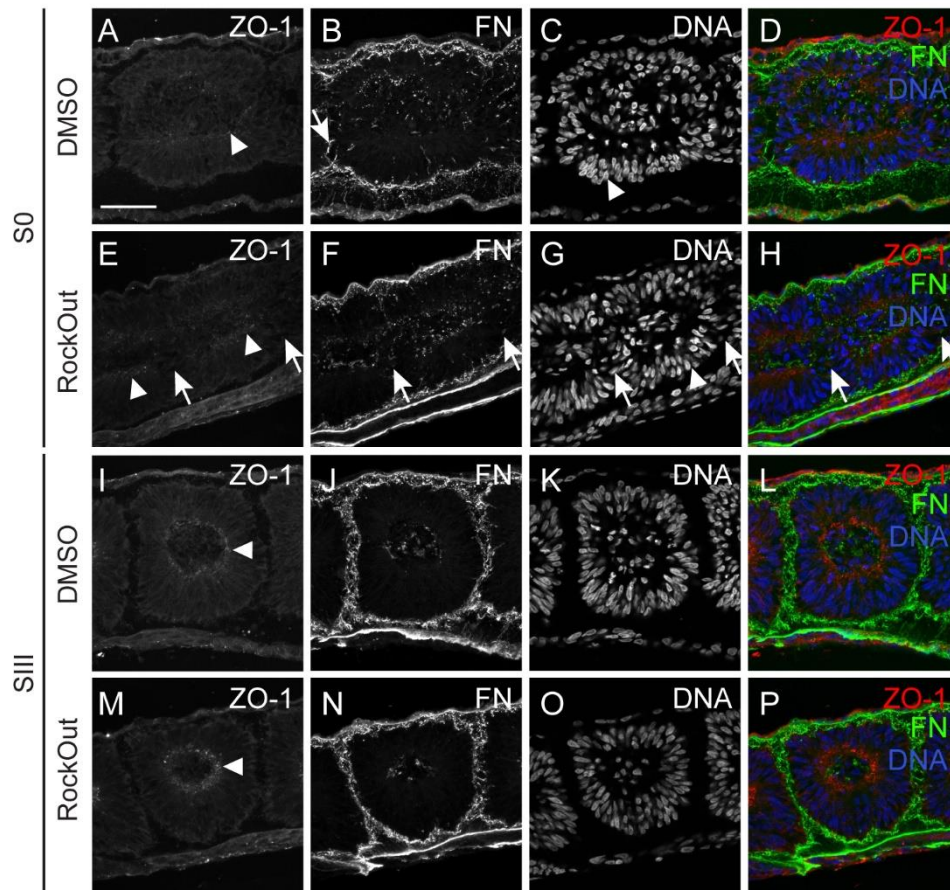

230

231 **Figure 3. ROCK I/II inhibition impairs morphological somite formation, leading to deficient ZO-1**  
232 **polarization and fibronectin assembly.**

233 **(A-P)** Sagittal views of explants cultured in control (DMSO) medium (A-D, I-L) and their contralateral  
234 RockOut-treated halves (E-H, M-P) at S0 (A-H; region e in Figure 1 A) and SIII (I-P; region b in Figure 1 A)  
235 levels, immunostained for ZO-1 (first column), fibronectin (second column), stained for DNA (third column)  
236 and the respective merged image (fourth column). Explants were cultured for 6 hours. S0 in control explants  
237 show normal accumulation of ZO-1 (A, arrowhead), fibronectin assembly in the nascent cleft (B, arrow) and  
238 nuclear alignment (C, arrowhead). In contrast, S0 in contralateral RockOut-treated explants fails to form a  
239 clear cleft (E-H, arrows), although ZO-1 is generally polarized (E, arrowhead) and nuclei are aligned (G,  
240 arrowhead). At SIII level, both explants show normal ZO-1 polarization (I, M, arrowheads), fibronectin  
241 assembly (J, N) and nuclear alignment (K, O). Rostral on the left and dorsal on top. FN – fibronectin. ZO-1 –  
242 *Zonula occludens* protein 1. Scale bar: 50  $\mu$ m.

243

244

245 Integrin-fibronectin binding regulates segmentation clock oscillations and is required for somitic  
246 cleft positioning and morphogenesis

247 Fibronectin signaling through  $\alpha 5\beta 1$  integrin plays a crucial role during somitogenesis  
248 (Takahashi et al., 2007). To evaluate if this interaction could be regulating segmentation clock  
249 oscillations and somite formation upstream of the intracellular mechanotransduction pathway,

250 embryo half explants were cultured in the presence of the RGD peptide which competes with  
251 fibronectin for integrin binding (Figure 4 A, B). RGD-treated explants formed ill-defined somite-like  
252 condensations, although in approximately the same number as the contralateral control (Figure 4  
253 C). This was not due to cell death (Supplementary Figure 2 E-F). Concomitantly, RGD-treated  
254 explants displayed alterations in *hairy1* (Figure 4 D, a-c), *meso1* (Figure 4 D, d-f) and *dll1* expression  
255 patterns (Figure 4 D, g-i), evidencing that integrin-RGD interactions are required for proper  
256 segmentation clock oscillations, *meso1* positioning and timely downregulation of *dll1* in the  
257 anterior PSM.

258           When compared to the contralateral control, the area corresponding to S0 after 6 hours  
259 of culture with RGD (region e in Figure 1 A) showed deficient nuclear alignment (Figure 5 B, E, H,  
260 K, arrowheads) and N-cadherin polarization (Figure 5 A, G, arrowheads), accompanied by deficient  
261 fibronectin assembly in the nascent cleft (Figure 5 D, J arrowheads). At the level of SII (region c in  
262 Figure 1 A), complete somite individualization was impaired in RGD-treated explants (Figure 5 N,  
263 Q, T, W, arrowheads) and, although N-cadherin polarization appeared normal (Figure 5 M, S,  
264 arrowheads), cleft formation (Figure 5 Q, W, arrowheads; R, X) and fibronectin assembly between  
265 adjacent somites was deficient (Figure 5 P, V, arrowheads; R, X).

266           These findings implicate cell-ECM interactions, mediated by integrin-fibronectin binding,  
267 in temporal control of *hairy1* oscillations, correct positioning of *meso1* expression, downregulation  
268 of *dll1* in the anterior PSM and somite morphogenesis.

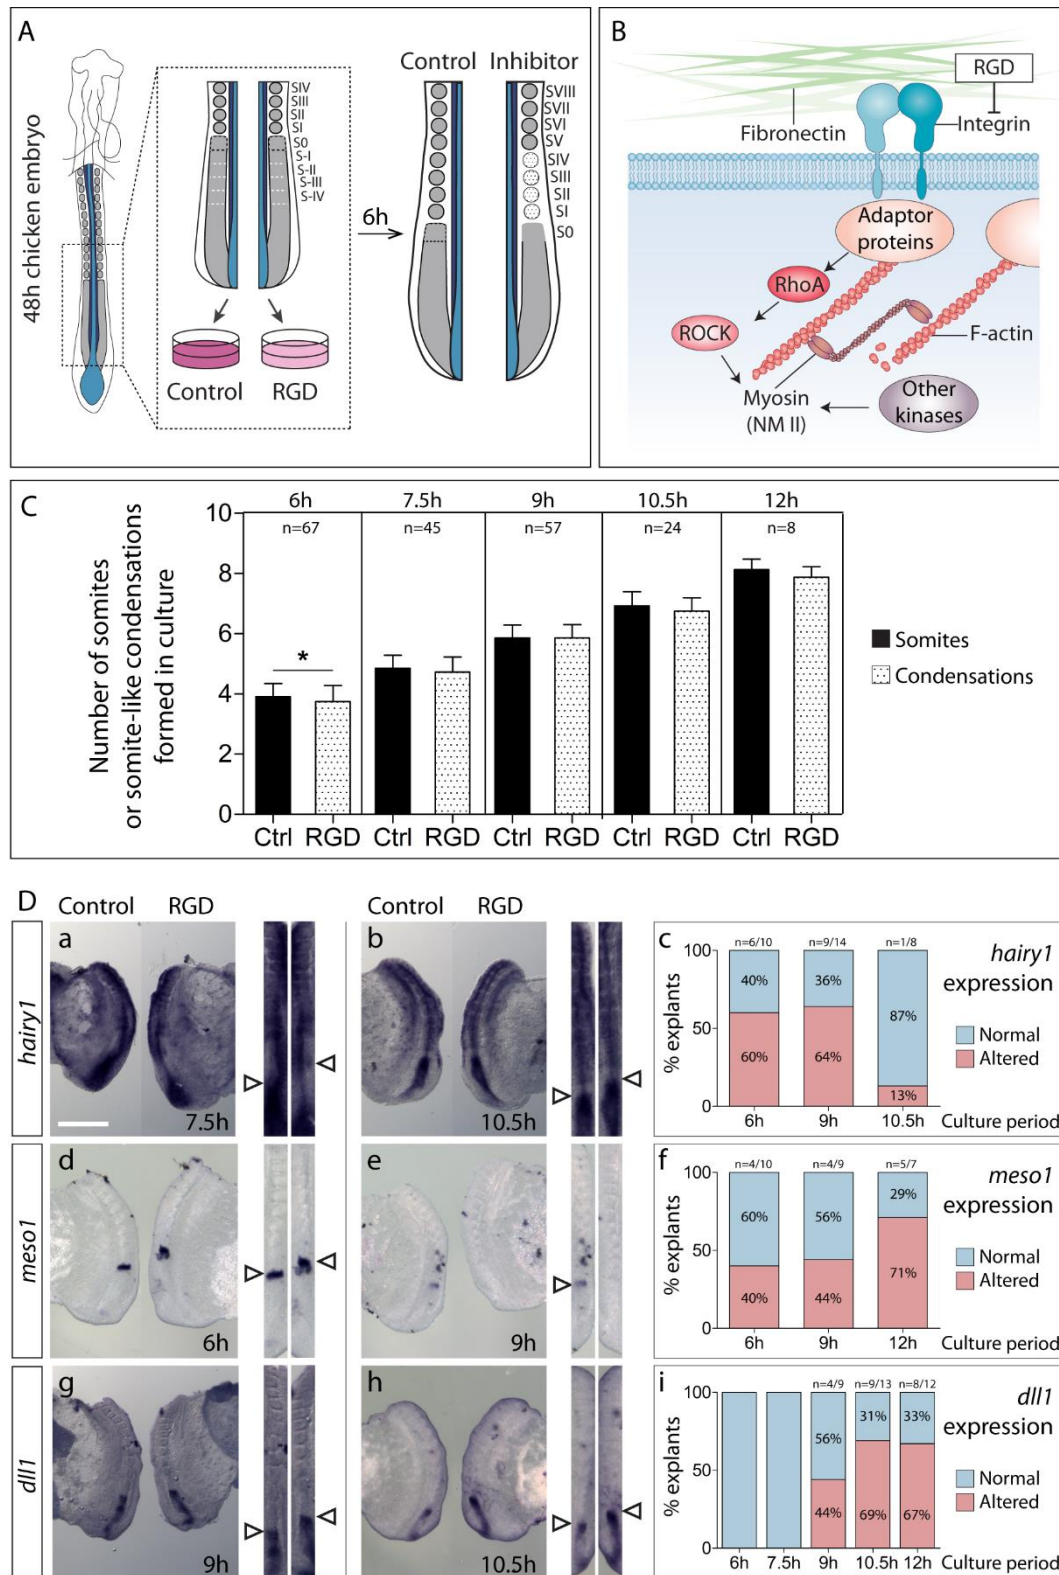

269  
270  
271  
272  
273  
274  
275  
276

**Figure 4. Integrin-fibronectin binding through RGD is required for timely *hairy1* and *meso1* expression and *dll1* downregulation.**

(A) Schematic representation of the explant culture system. Posterior explants of HH11-14 chick embryos were bisected along the midline and cultured for 6 to 12 hours. One side of the explant was cultured with RGD, while the contralateral half was cultured in control medium. (B) Schematic representation of the action of RGD. RGD competes with the RGD-binding pockets of integrins, interfering with their binding to the ECM. (C) Number of somites (black bars) or somite-like condensations (dotted bars) formed in culture in control

277 and RGD-treated explants. \* $p < 0.05$ . **(D)** Expression of *hairy1* (a, b), *meso1* (d, e) and *dll1* (g, h) in RGD-treated  
 278 explants and contralateral controls at representative timepoints of culture. Straightened images of  
 279 respective explant pairs (right) aligned by SIV. Rostral is on top. Percentage of RGD-treated explants with  
 280 altered *hairy1*, *meso1* and *dll1* expression compared to the contralateral controls is shown in c, f and i,  
 281 respectively. Impairing integrin-fibronectin binding with RGD alters *hairy1* and *meso1* expression relative to  
 282 contralateral controls at 6 hours of culture onwards (a-f, arrowheads). *dll1* expression was altered at 9 hours  
 283 of culture onwards (g-i, arrowheads). Scale bar: 500  $\mu\text{m}$ .  
 284

285

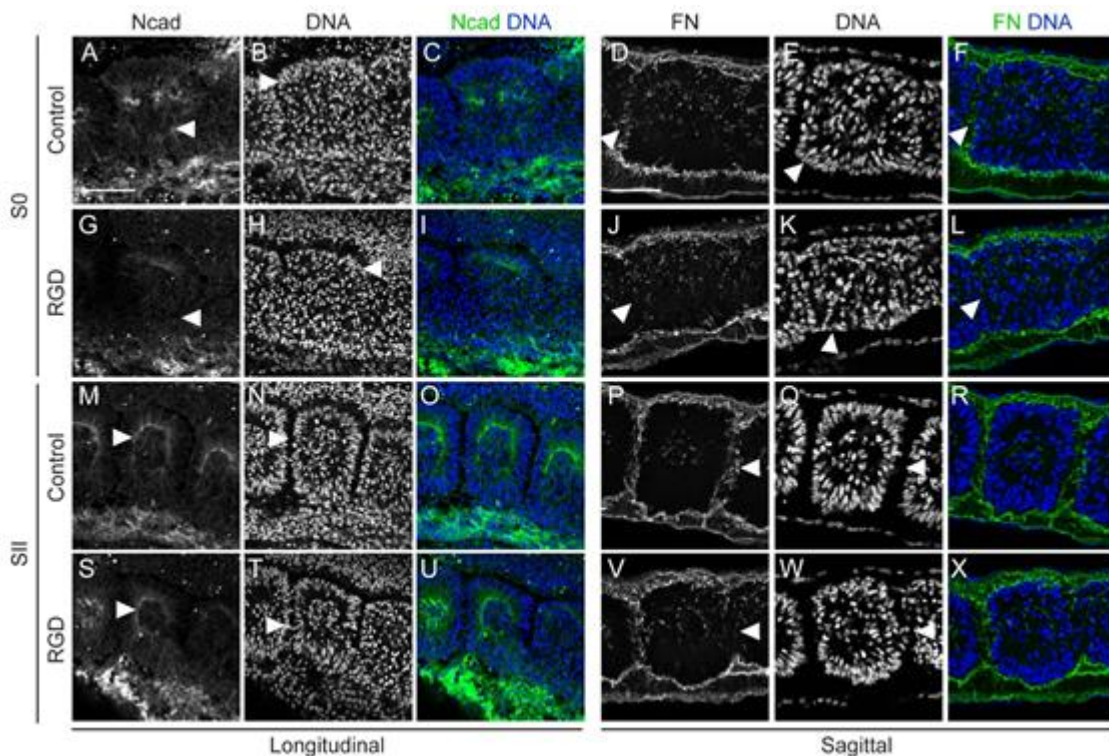

286  
 287 **Figure 5. Inhibition of integrin-fibronectin binding impairs somitic cleft formation.**  
 288 **(A-X)** Longitudinal (left) and sagittal (right) views of explants cultured in control medium (A-F, M-R) and their  
 289 contralateral RGD-treated halves (G-L, S-X) at S0 (A-L; region e in Figure 1 A) and SII (M-X; region c in Figure  
 290 1 A) levels, immunostained for N-cadherin (first column), fibronectin (fourth column) and stained for DNA  
 291 (second and fifth columns). Third and sixth columns show the respective merged images. Explants were  
 292 cultured for 6 hours. At the S0 level, control explants show normal apical accumulation of N-cadherin (A,  
 293 arrowheads) and nuclear alignment (B, E, arrowheads) in peripheral somitic cells as well as fibronectin  
 294 assembly in the nascent cleft (D, F, arrowheads). All of these are deficient in their RGD-treated contralateral  
 295 halves (G-L, arrowheads). At the level of SII, N-cadherin accumulation and nuclear alignment occurs normally  
 296 in both control and RGD-treated explants (M, N, S, T, arrowheads), but fibronectin assembly between  
 297 adjacent somites (P, V, arrowheads) and cleft formation (Q, W, arrowheads) are deficient in RGD-treated  
 298 explants compared to contralateral controls. Ncad – N-cadherin; FN – fibronectin. Scale bars: 50  $\mu\text{m}$ .

299 Impaired fibronectin assembly results in altered segmentation clock dynamics, *meso1* expression  
300 and defects in somite morphogenesis

301 To interrogate the importance of the mechanical properties of the extracellular fibronectin  
302 matrix on somite formation, we perturbed fibronectin assembly in the PSM and somites by  
303 electroporating primitive streak-stage embryos with a construct expressing the 70kDa fibronectin  
304 fragment, a dominant-negative inhibitor of fibronectin assembly (Figure 6 A, B; McKeown-Longo  
305 and Mosher, 1985; Sato et al., 2017). 70kDa-electroporated embryos exhibited a disrupted  
306 fibronectin matrix, composed of thinner fibrils when compared with control pCAGGs-  
307 electroporated embryos (Supplementary Figure 6 A; also see Figure 7 A, B), and displayed multiple  
308 morphological defects, including kinked neural tube and detached tissues as well as perturbations  
309 in somite morphogenesis, which are all reminiscent of phenotypes obtained in previous studies  
310 interfering with fibronectin-integrin binding (Supplementary Figure 6 B, C; Drake et al., 1992;  
311 Drake and Little, 1991; George et al., 1993; Girós et al., 2011; Takahashi et al., 2007). Although the  
312 average number of somite-like structures formed in 70kDa-electroporated embryos was similar to  
313 the number of somites in controls (Figure 6 C) they were ill-defined, often appearing fused or  
314 crammed (Supplementary Figure 6 B e-f, C), and thus resemble the somite-like condensations  
315 formed in RockOut- and RGD-treated explants (Figures 3 and 5).

316 Next, we sought to evaluate the impact of inhibiting fibronectin matrix assembly on the  
317 molecular machinery underlying somite formation by using unilateral electroporation of the 70kDa  
318 fragment (Figure 6 A) to allow the direct comparison of gene expression patterns within the same  
319 embryo. We observed a significant increase in the frequency of perturbations in the expression of  
320 embryonic clock genes *hairy1* ( $p < 0.01$ ) and *hairy2* ( $p < 0.05$ ), as well as in *meso1* ( $p < 0.01$ ) and *dll1*  
321 ( $p < 0.01$ ), when compared with embryos electroporated with pCAGGs alone (Figure 6 D).

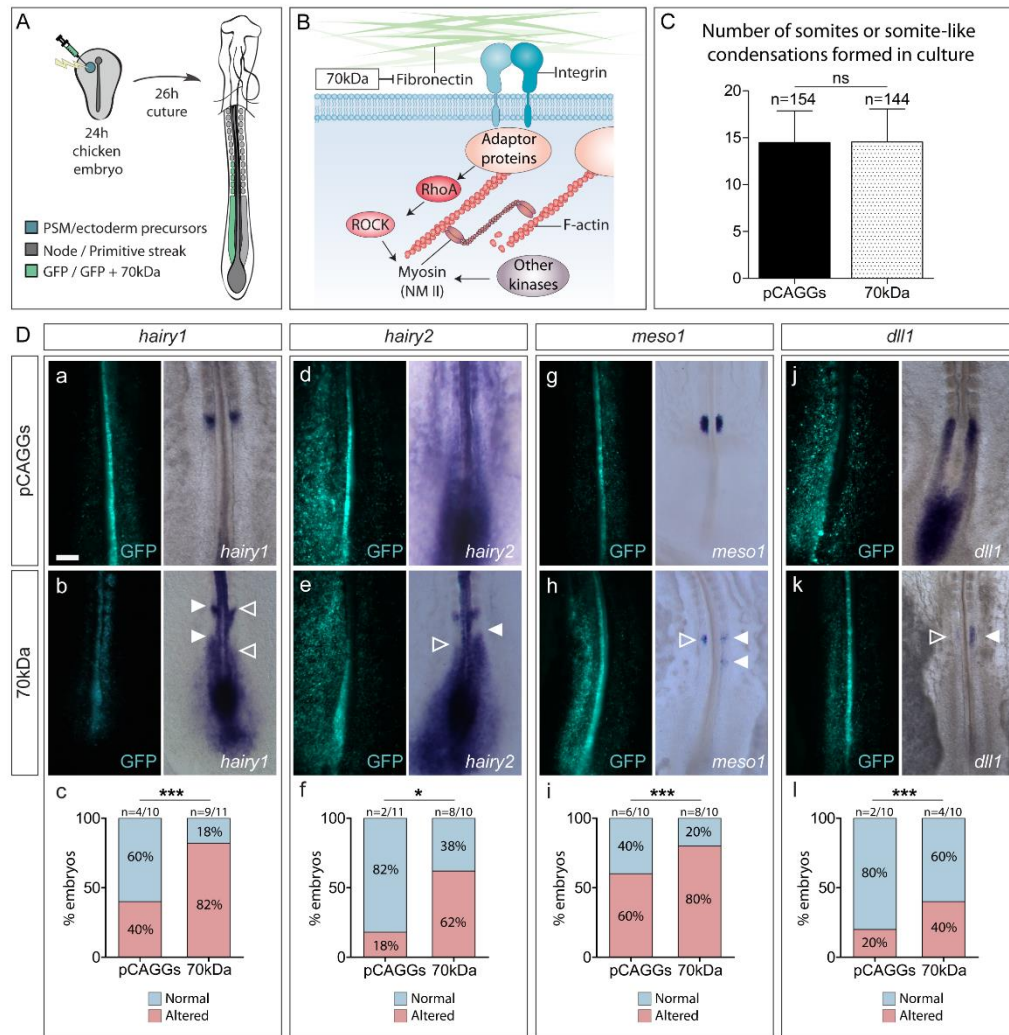

322

323

324

325

326

327

328

329

330

331

332

333

334

335

336

337

338

339

340

**Figure 6. Impairing fibronectin assembly by electroporation with a 70kDa expressing vector perturbs segmentation clock oscillations, timely *meso1* expression and *dll1* downregulation.**

(A) Schematic representation of the electroporation strategy. PSM/ectoderm progenitors of primitive-streak stage embryos were electroporated with either a pCAGGs GFP-expressing vector (pCAGGs) alone, or co-electroporated with a 70kDa-expressing vector (70kDa) and were incubated for about 26 hours. (B) Schematic representation of the action of 70kDa. 70kDa disrupts the assembly of fibronectin matrix by competitively binding to the N-terminal self-assembly domains of the protein, impairing fibronectin fibril formation. (C) Number of somites (black bars) or somite-like condensations (dotted bars) formed in pCAGGs- and 70kDa-electroporated embryos after 26 hours. (D) Examples of the expression of *hairy1* (a-b), *hairy2* (d-e), *meso1* (g-h) and *dll1* (j-l) in pCAGGs- (top row) and 70kDa-electroporated embryos (middle row). Electroporated side is on right (a, b, g) or left (d, e, h, j, k). Perturbing the assembly of fibronectin on one side of the PSM leads to an asymmetric pattern of *hairy1* (b, arrowheads), *hairy2* (e, arrowheads), *meso1* (h, arrowheads) and *dll1* expression (k, arrowheads) in a higher percentage of embryos than in controls. Percentage of pCAGGs- and 70kDa-electroporated embryos with asymmetric expression of *hairy1*, *hairy2*, *meso1* and *dll1* between the electroporated PSM and the contralateral non-electroporated control PSM is shown in c, f, i and l, respectively. The number of embryos with an asymmetric pattern was significantly higher in 70kDa-electroporated embryos for all four genes studied. \*  $p < 0.05$ , \*\*\*  $p < 0.01$ . Rostral is on top. Scale bar: 200  $\mu$ m.



341 Consistent with these data, 70kDa-electroporated embryos have deficiencies in somite  
342 morphogenesis which, in severe cases, leads to incomplete somitic clefts (Figure 7 A, B k, w,  
343 arrows). Peripheral cells of nascent somites of 70kDa-electroporated embryos did, however,  
344 accumulate ZO-1 apically (Figure 7 B e, h, i, l) which was maintained as the somites matured (Figure  
345 7 B q, u, t, x). Nevertheless, these somites were abnormal in shape and appeared smaller in  
346 severely affected embryos (Figure 7 B, i-l, u, x). In fact, the SI of the electroporated sides of 70kDa-  
347 treated embryos were significantly smaller in width than those of the contralateral control, while  
348 SV was significantly shorter in length (n=151; Supplementary Figure 7). In addition to defects in  
349 somite morphology, the ectoderm and endoderm were separated from the paraxial mesoderm in  
350 70kDa-electroporated embryos, indicating that their fibronectin matrix was insufficient to hold  
351 these tissues together (brackets in Figure 7 B g, k, s, w).

352 We conclude that unperturbed fibronectin assembly in the PSM is required for tuning clock  
353 gene expression dynamics, positioning of *meso1* expression and timely *dll1* downregulation in the  
354 rostral-most PSM, as well as for the complete separation and morphogenesis of somites.

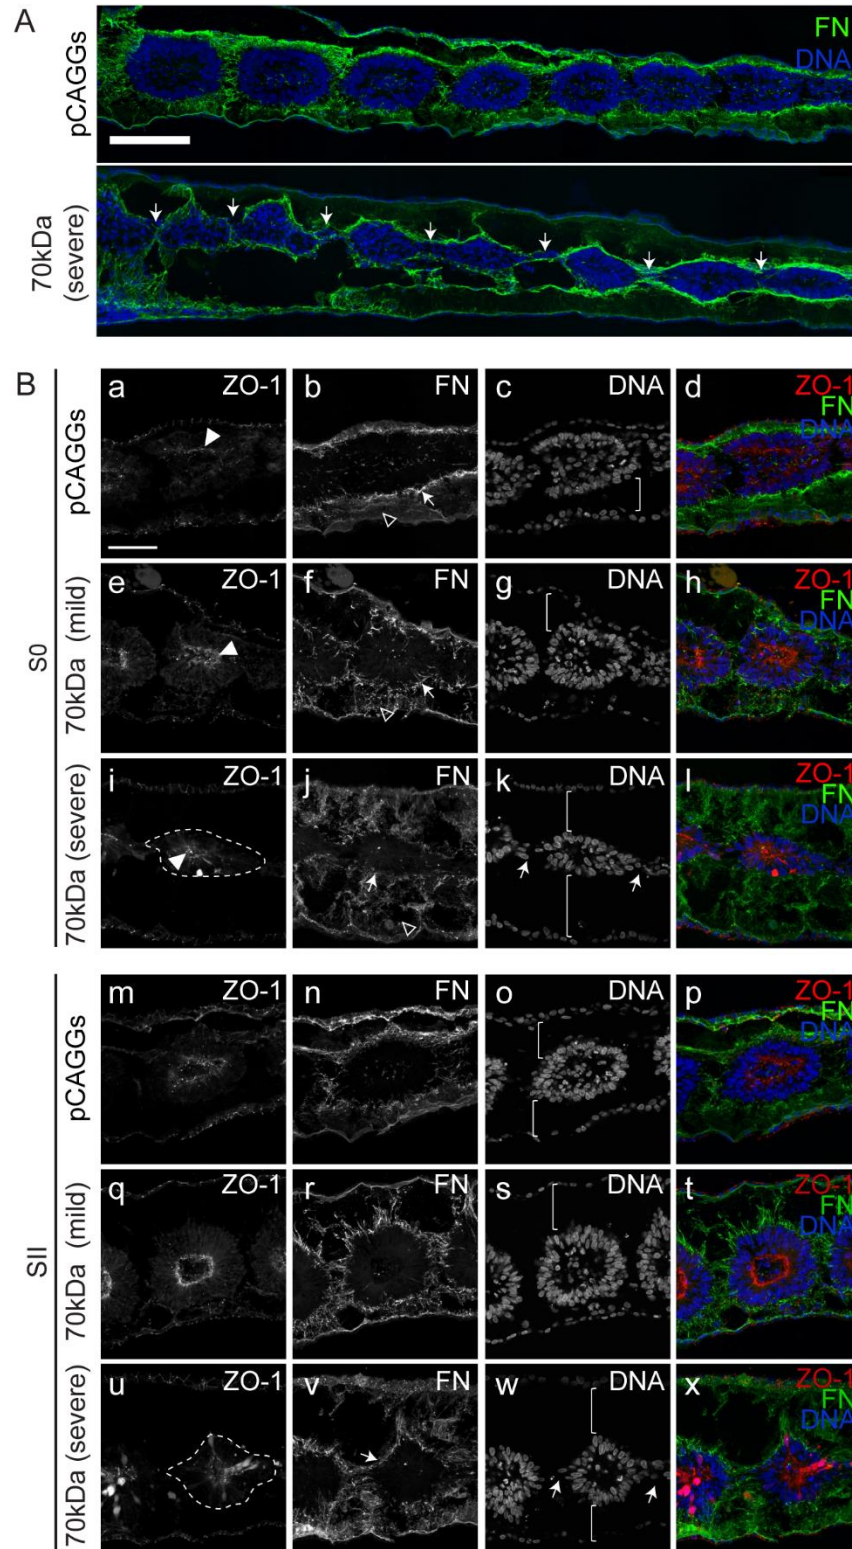

355  
356  
357  
358  
359  
360  
361  
362

**Figure 7. Somite morphology of 70kDa-electroporated embryos is severely compromised.**

(A) Sagittal sections of embryos electroporated with pCAGGs and 70kDa, the latter with a severe phenotype. Arrows point to deficient somitic clefts. Rostral to the left and dorsal on top. (B) Sagittal views of embryos electroporated with pCAGGs (a-d, m-p) and 70kDa (e-l, q-x) with either mild (e-h, q-t) or severe (i-l, u-x) phenotypes, at S0 (a-l) and SII (m-x) levels, immunostained for ZO-1 (first column) and fibronectin (second column) and stained for DNA (third column). Fourth column shows the merge of the respective channels. S0 of pCAGGs- and 70kDa-electroporated embryos all polarize ZO-1 normally (a, e, i, arrowheads) and this is

363 maintained at SII levels (m, q, u), but the fibronectin matrix surrounding the somites of 70kDa-treated  
364 embryos is disrupted compared to pCAGGs-electroporated embryos (b, f, j, v, arrows). Somites of 70kDa-  
365 electroporated embryos are also severely detached from both the ectoderm and endoderm compared to  
366 embryos electroporated only with pCAGGS (third column, brackets), and the fibronectin matrix connecting  
367 the endoderm to the somites is severely compromised (second column, empty arrowheads). Somites of  
368 embryos electroporated with 70kDa with more severe defects also fail to fully detach from adjacent somites  
369 (k, w, arrows). Rostral to the left and dorsal to the top. Dashed lines indicate altered somite morphology. FN  
370 – fibronectin. ZO-1 – *Zonula occludens* protein 1. Scale bars: 50  $\mu$ m.

371

372

### 373 **Discussion:**

#### 374 Fibronectin matrix and its downstream mechanotransduction pathway coordinate segmentation 375 clock dynamics and segment boundary formation

376 We have identified a mechanotransduction pathway involving a fibronectin – integrin –  
377 ROCK – NM II axis, which regulates the dynamics of segmentation clock gene expression in the  
378 chick embryo. Four independent treatments interfering with different levels of this pathway (from  
379 intracellular actomyosin contractility to fibronectin matrix assembly; Figure 8 A), all lead to altered  
380 segmentation clock dynamics, misregulated *meso1* expression, impaired or deficient cleft  
381 formation and alterations in somite morphology (Figure 8 B).

382 The similarity of the phenotypes obtained in experiments blocking ROCK I/II and impairing  
383 normal cell-fibronectin interactions with RGD or 70kDa (Figure 8 B) suggest that the fibronectin  
384 matrix is transducing mechanical signals via ROCK and  $\alpha 5\beta 1$  integrin, the major fibronectin  
385 receptor in the PSM (Jülich et al., 2005; Rifes et al., 2007; Yang et al., 1999), and that these signals  
386 affect segmentation clock oscillations. Indeed, the fibronectin –  $\alpha 5\beta 1$  integrin – ROCK – NM II axis  
387 is believed to play key roles in cellular force generation in a variety of cell types (Bharadwaj et al.,  
388 2017; Daley et al., 2011; Schiller et al., 2013; Torr et al., 2015). Our data show that blocking  
389 different elements of this axis leads to asymmetric patterns of *hairy1* expression as well as  
390 incorrect positioning of *meso1* expression on the experimental versus the control sides of the same  
391 embryo. Moreover, they suggest that the mechanical environment is regulating Notch signaling in

392 the PSM. This is in agreement with a previous report, evidencing that  $\beta 1$  integrins are needed for  
393 correct Notch signaling in neural progenitors (Campos et al., 2006). Combined roles of integrin  
394  $\alpha 5\beta 1$  and Notch are also required for zebrafish somitogenesis (Jülich et al., 2005) and chicken  
395 embryos electroporated with RNAi constructs against integrin  $\beta 1$  show alterations in *hairy2*, *lfn3*  
396 and *meso1* expression in the PSM (Rallis et al., 2010). Finally, mouse embryos expressing  
397 fibronectin where the RGD sequence was substituted with RGE (*Fn1<sup>RGE/RGE</sup>* embryos) showed  
398 asymmetric and/or dampened expression of *Lfn3* and *Hes7* in the PSM (Girós et al., 2011) and  
399 *EphA4*, a direct target of *Mesp2* in the anterior PSM (Nakajima et al., 2006), was diffusely  
400 expressed or absent (Girós et al., 2011).

401 Exactly how the mechanical environment regulates segmentation clock oscillations is  
402 unknown. However, it is becoming increasingly clear that mechanics play a crucial role in Notch  
403 activation (Gordon et al., 2015; Luca et al., 2017; Meloty-Kapella et al., 2012) and it was recently  
404 demonstrated that sustained Notch signaling in the *Drosophila* notum requires actomyosin  
405 contractility in both signal sending and receiving cells (Hunter et al., 2019). It is thus possible that  
406 cells in the PSM become detached from their neighbors when their mechanical environment or  
407 intracellular contractility is impaired. This may place Notch receptors and ligands of adjacent PSM  
408 cells further apart, leading to a reduction in the incidence or duration of Notch signaling events.

409 Altogether, our results strongly suggest the existence of a link between the fibronectin –  
410  $\alpha 5\beta 1$  integrin – ROCK – NM II pathway and Notch signaling in the PSM. When perturbed, this leads  
411 to a dysregulation of segmentation clock oscillations and the mispositioning of the segmental  
412 border.

413

#### 414 Somite cleft formation and cell epithelialization have different mechanical requirements

415 In the rostral PSM, *Mesp2*/*Meso1* activates the expression of *EphA4*, which interacts with  
416 *EphrinB2* in cells rostral to the presumptive cleft, causing cell-cell repulsion and the formation of  
417 an incipient cleft (Nakajima et al., 2006; Watanabe et al., 2009). Then, fibronectin matrix assembly

418 stabilizes it (Jülich et al., 2015; Rifes and Thorsteinsdóttir, 2012) and promotes the epithelialization  
419 of cells rostral to the cleft (Martins et al., 2009). This can be defined as the first step of  
420 morphological somite individualization. The second step is defined as the complete  
421 epithelialization of the remaining cells of the nascent somite and lasts until SII, when all somitic  
422 cells have acquired a spindle-like shape and are organized into a rosette (Martins et al., 2009).

423 RockOut-, RGD- and 70kDa-treated embryos (Figure 8 A, B) all show perturbations in  
424 segmentation clock gene expression, abnormal positioning of *meso1* and defects in somite  
425 boundary development. Although somite morphology is also perturbed, the acquisition of the  
426 spindle-shape cell morphology which occurs as S0 develops into SII does not appear to be  
427 significantly perturbed. Thus, the first step of morphological somite formation is affected but the  
428 second step is not. In contrast, Blebbistatin-treated explants not only have the defects listed  
429 above, but cells that had already upregulated *meso1* before the addition of the drug and formed  
430 an incipient cleft during culture, were completely unable to epithelialize. In fact, Blebbistatin-  
431 treated explants formed only 1 or 2 somites, and their cells did not acquire the elongated, spindle-  
432 shape typical of SI and SII somites. Hence, Blebbistatin affects both steps of morphological somite  
433 formation.

434 RockOut targets NM II activity indirectly by inhibiting ROCK I and II, two of the kinases that  
435 activate NM II (Newell-Litwa et al., 2015). In contrast, Blebbistatin directly targets the NM II  
436 ATPase. Our results thus raise the possibility that the acquisition of the spindle-shaped  
437 morphology of cells is dependent on another NM II activator. Interestingly, Ca<sup>++</sup>/calmodulin  
438 signaling can activate NM II and inhibiting calmodulin was shown to block the acquisition of this  
439 morphology during chick somitogenesis (Chernoff and Hilfer, 1982).

440

#### 441 Fibronectin matrix complexity gradient as a player in the PSM wavefront of maturation

442 While the waves of Notch oscillatory activity travel through the entire length of the PSM,  
443 they are only translated into segments in the anterior-most region of the tissue. Opposing

444 gradients of Fgf/Wnt and Retinoic acid (RA) in the PSM are thought to define the wavefront, which  
445 marks the region where PSM cells become competent for somite formation (Hubaud and  
446 Pourquié, 2014). Rostral to the wavefront, segmentation clock oscillations progressively slow  
447 down until they reach a halt and cells become part of a somite (Palmeirim et al., 1997).

448         Herein, we propose a model (Figure 8 C) where the posterior to anterior gradient of  
449 fibronectin matrix complexity is interpreted by the PSM cells as an increasing gradient of  
450 mechanical tension (Figure 8 C). We propose that the tensional state created by the fibronectin  
451 matrix surrounding the PSM at the level of the wavefront acts as a threshold which activates a  
452 mechanotransduction signaling cascade ensuring the correct spatio-temporal conversion of the  
453 cyclic expression of segmentation clock genes into periodic *meso1* expression which defines the  
454 next somitic cleft (Figure 8 C). In support of this hypothesis, a gradient of increasing paraxial  
455 mesoderm stiffness from the tail to rostral somites has recently been identified in the chick  
456 embryo (Marrese et al., 2019). The PSM thus integrates a combination of chemical and mechanical  
457 signals, namely gradients of Fgf/Wnt and RA (Aulehla and Pourquié, 2010) and, simultaneously, an  
458 increase in fibronectin matrix complexity and stiffness (Figure 8 C). The fibronectin matrix would  
459 thus be a key contributor to the PSM wavefront of maturation in that it regulates where the next  
460 somitic cleft is positioned while simultaneously supporting a cohort of competent cells as they bud  
461 off from the anterior PSM as somites (Figure 8 C). Hence, we propose that the  
462 mechanotransduction pathway downstream of fibronectin plays a major role in the translation of  
463 cyclic waves of expression of segmentation clock genes into the periodic morphogenesis of  
464 somites.

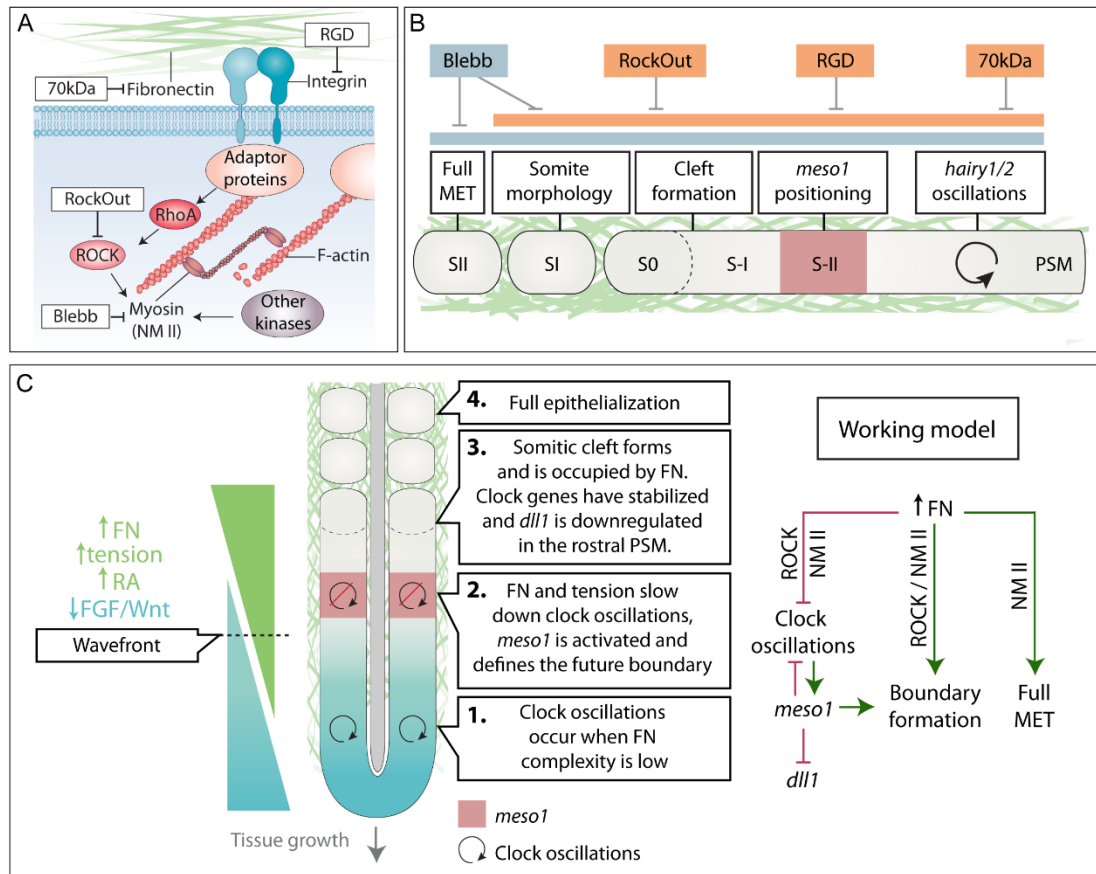

465

466

**Figure 8. Summary of the results and working model.**

467

**(A)** Schematic representation of the fibronectin – integrin – ROCK – NM II axis and targets of experimental

468

inhibition. **(B)** Effect of the different treatments on somitogenesis. Interfering with fibronectin matrix

469

assembly (70kDa), integrin-fibronectin binding (RGD), ROCK I/II (RockOut) or NM II (Blebb) activity, leads to

470

altered segmentation clock dynamics, misregulated *meso1* expression, impaired or deficient cleft formation

471

and alterations in somite morphology. Interfering directly with NM II further disrupts full somite

472

epithelialization. **(C)** Working model proposing that an increase of fibronectin matrix complexity in the PSM,

473

from caudal to rostral, is sensed by cells as a tensional gradient, with anterior PSM cells being in the stiffest

474

environment. This increased tensional gradient occurs concomitantly with a decrease in Fgf/Wnt levels and

475

an increase in RA. As cells reach the wavefront and sense a threshold of fibronectin-induced stiffness, there

476

is an increase in fibronectin-integrin engagement which activates ROCK and NM II, leading to increased

477

actomyosin contractility and slower clock oscillations. As Notch signaling becomes stabilized, it activates

478

*meso1* expression in the S-II/S-I region, setting the stage for cleft formation and *dll1* downregulation in the

479

rostral-most PSM later on. As the clefts form, somites bud off as S-I. Finally, ROCK-independent NM II activity

480

is required for full somite epithelialization into S-II.

481 **Materials and Methods:**

482 Embryos

483 Fertile eggs were obtained from commercial sources (Sociedade Agrícola Quinta da Freiria  
484 or Pintobar Exploração Avícola, Lda, Portugal) and incubated at 37.5°C in a humidified chamber  
485 until the desired HH stage (Hamburger and Hamilton, 1992). Somite nomenclature is according to  
486 Pourquié and Tam (2001).

487

488 Embryo explant culture and chemical treatments

489 Explant tissues of HH11-14 embryos were collected and cultured as previously described  
490 (Palmeirim et al., 1997; Rifes et al., 2007). Embryos were bisected along the midline and then cut  
491 transversally rostral to somites IV and Hensen's node. The two contralateral halves thus retained  
492 half of the neural tube and notochord as well as the first four somites and the PSM, with all  
493 remaining neighboring tissues intact. Explants were placed on top of a polycarbonate filter floating  
494 on M199 medium supplemented with 10% chick serum, 5% fetal calf serum and 100 U/ml of  
495 penicillin and streptomycin (Palmeirim et al., 1997). Explants were then cultured at 37°C with 5%  
496 CO<sub>2</sub> from 6 to 12 hours.

497 InSolution™Blebbistatin (Calbiochem) and RockOut (Calbiochem) diluted in DMSO were  
498 used at a final concentration of 50 µM in culture medium. Equal volumes of DMSO (Sigma-Aldrich)  
499 were used as control for both drugs. The RGD peptide (Sigma) was diluted in culture medium and  
500 used at 0.9 mM, while control explants were cultured in medium only. RGD peptide efficiency was  
501 confirmed in a cell adhesion assay (Danen et al., 2002; Pierschbacher and Ruoslahti, 1984) before  
502 using it on explants.

503

504 Embryo electroporation and *ex ovo* culture

505 HH4-5 embryos were electroporated on one (randomly selected) side of the primitive  
506 streak in the presumptive PSM and/or ectoderm and cultured *ex ovo* using the Early Chick culture



507 method (Chapman et al., 2001). The electroporation mixture contained plasmid DNA at 0.5-1 µg/µl  
508 mixed with 0.4% Fast Green for visualization. Embryos were submerged in an electroporation  
509 chamber filled with Tyrode's saline and three pulses of 6-9 V, 50 ms each, at 350 ms intervals were  
510 applied. Control embryos were electroporated with pCAGGs containing a GFP reporter (pCAGGs-  
511 GFP; abbreviated pCAGGs). pCAGGs-70kDa qFN1 was kindly provided by Yuki Sato (Sato et al.,  
512 2017) and was co-electroporated with the pCAGGs-GFP plasmid in experimental embryos  
513 (treatment abbreviated 70kDa). Electroporated embryos were screened for GFP after fixation to  
514 select embryos with an intense signal on only one side to process for whole mount morphological  
515 analysis, *in situ* hybridization experiments and transverse sectioning. For morphological analysis in  
516 sagittal sections, the embryo side electroporated with pCAAGGs was compared to the 70kDa-  
517 electroporated side of other same stage embryos.

518

#### 519 Cryosectioning and immunohistochemistry

520 Cryosectioning was performed on whole embryos and embryo explants fixed in 4%  
521 paraformaldehyde in 0.12 M phosphate buffer containing 4% sucrose and processed for  
522 cryoembedding as previously described. Briefly, fixed samples were embedded in 7.5% gelatin in  
523 0.12 M phosphate buffer containing 15% sucrose, frozen on dry ice-chilled isopentane and stored  
524 at -80°C until sectioning. Cryostat sections (10-30 µm) were processed for immunofluorescence as  
525 previously described (Gomes de Almeida et al., 2016). Permeabilization of sections was performed  
526 with 0.2% Triton-X100 in phosphate buffered saline (PBS). 5% bovine serum albumen (BSA) or a  
527 combination of 1% BSA and 10% Normal Goat Serum (NGS) in PBS were used for blocking  
528 depending on the presence or absence of anti-fibronectin antibodies, respectively. Primary and  
529 secondary antibodies were diluted in 1% BSA in PBS. Sections were incubated with primary  
530 antibodies overnight at 4°C and with secondary antibodies for 1 hour at room temperature. For  
531 whole-mount immunodetection, explants were fixed in 4% paraformaldehyde in PBS and  
532 processed as previously described (Martins et al., 2009; Rifes and Thorsteinsdóttir, 2012). 1%

533 Triton-X100 in PBS was used for permeabilization and 1% BSA in PBS was used for blocking and  
534 antibody dilution. Antibody incubation was performed overnight at 4°C.

535 The following primary antibodies were used: anti-ZO-1 (Zymed, 1:100 or Invitrogen,  
536 1:100); anti-N-cadherin (BD Biosciences, 1:100); anti-fibronectin (Sigma, 1:400), anti-activated  
537 caspase3 (Cell Signaling, 1:1000) and anti-GFP (Invitrogen, 1:100). For F-actin staining we used  
538 Alexa 488-conjugated phalloidin (Invitrogen, 1:40) and for staining DNA we used ToPro3  
539 (Invitrogen, 1:500) in conjunction with ribonuclease A (Sigma, 10 µg/ml), 4% Methyl Green (Sigma,  
540 diluted 1:250; Prieto et al., 2015) or 4',6-diamidino-2-phenylindole (DAPI, 5µg/ml in PBS with 0.1%  
541 Triton-X100). For detection of the primary antibodies the adequate secondary goat anti-mouse  
542 and anti-rabbit Alexa 488-, Alexa 568- or Alexa 546-conjugated F'ab fragments from Invitrogen  
543 were used (1:1000).

544

#### 545 In situ hybridization

546 *In situ* hybridization using DIG-labeled RNA probes was performed as described previously  
547 (Henrique et al., 1995) with minor alterations (Gomes de Almeida et al., 2016). RNA probes were  
548 synthesized from linearized plasmids: *dll1* (Henrique et al., 1995), *meso1* (Buchberger et al., 1998),  
549 *hairy1* (Palmeirim et al., 1997) and *hairy2* (Jouve et al., 2000).

550

#### 551 Statistical analysis

552 Paired Student's t-tests were performed to assess for differences in the number of somites  
553 formed in Blebbistatin-, RockOut- and RGD-treated explants relative to the respective controls,  
554 and in embryos electroporated with pCAGGs only and pCAGGs + 70kDa. Differences in the  
555 frequency of morphological and gene expression phenotypes found in 70kDa-electroporated  
556 embryos compared to pCAGGs-electroporated control embryos was tested through a Chi-square  
557 test. Differences in somite size between pCAGGs- or 70kDa-electroporated sides compared to the  
558 control (non-electroporated) sides of embryos was tested through a nested ANOVA. The side in

559 which the embryo was electroporated (left or right) was nested in the treatment (non-  
560 electroporated, pCAGGs-electroporated or 70kDa-electroporated) to account for a potential  
561 variability between the two sides. Statistical significance was set at  $p < 0.05$ . Statistical analyses  
562 were performed in Statistica 10, Graphpad Prism 5 and RStudio.

563

#### 564 Sample preparation and imaging

565 Whole mount explants were gradually dehydrated in methanol and cleared in  
566 methylsalicylate (Sigma-Aldrich) as described previously (Martins et al., 2009; Rifes and  
567 Thorsteinsdóttir, 2012), except for phalloidin-labelled embryos and explants, where a shorter  
568 series of ethanol dehydration series was used. Cryostat sections were mounted in Vectashield  
569 (Vector Laboratories) or in 5mg/ml propyl gallate in glycerol/PBS (9:1) with 0.01% azide.  
570 Immunofluorescence images were taken on a confocal Leica SPE microscope, following imaging  
571 acquisition steps described previously (Rifes and Thorsteinsdóttir, 2012). Imaging of  
572 electroporated embryos and explants processed for *in situ* hybridization was performed using a  
573 Zeiss LUMAR V12 Stereoscope coupled to a Zeiss AxioCam 503 color 3MP camera. Image analysis  
574 was performed using Fiji v. 1.49 and Amira V.5.3.3 (Visage Imaging Inc.) software. Image histogram  
575 corrections were performed in Fiji and exported as TIFF files. When applicable, contiguous images  
576 were stitched together into a single image using the pairwise stitching Fiji plugin (Preibisch et al.,  
577 2009). For the analysis of *in situ* hybridization patterns along the PSM explants, the Fiji plugin  
578 Straighten (Kocsis et al., 1991) was used.

579

580

#### 581 **Acknowledgements:**

582 We thank Dr. Yuki Sato for generously sharing the pCAGGs-q70kDa construct and Inês Fragata for  
583 help with the statistical analysis. This work was supported by Fundação para a Ciência e a  
584 Tecnologia (FCT, Portugal) projects PTDC/SAU-OB/103771/2008, PTDC/BEXBID/5410/2014,

585 UID/BIA/00329/2013, UID/BIM/04773/2019 CBMR, and FCT scholarships SFRH/BD/86980/2012  
586 (PGA) and SFRH/BD/37423/2007 (PR). Imaging and image analysis were done in the Microscopy  
587 Facility at the Faculty of Sciences of the University of Lisbon and the Light Microscopy Unit of  
588 CBMR-UAIlg, nodes of the Portuguese Platform for BioImage (reference PPBI-POCI-01-0145-FEDER-  
589 022122). Finally, we are grateful to Isabel Palmeirim and all members of our laboratories for their  
590 support and helpful discussions.

591

592 **Competing interests:**

593 The authors declare no competing interests.

594

595

596 **References:**

597 Aulehla A, Pourquié O. 2010. Signaling gradients during paraxial mesoderm development. *Cold*  
598 *Spring Harb Perspect Biol* **2**:1–17. doi:10.1101/cshperspect.a000869

599 Bailey C, Dale K. 2015. Somitogenesis in vertebrate development ELS. Chichester, UK: John Wiley  
600 & Sons, Ltd. pp. 1–15. doi:10.1002/9780470015902.a0003820.pub2

601 Barriga EH, Franze K, Charras G, Mayor R. 2018. Tissue stiffening coordinates morphogenesis by  
602 triggering collective cell migration in vivo. *Nature* **554**:523–527. doi:10.1038/nature25742

603 Barrios A, Poole RJ, Durbin L, Brennan C, Holder N, Wilson SW. 2003. Eph/Ephrin signaling  
604 regulates the mesenchymal-to-epithelial transition of the paraxial mesoderm during somite  
605 morphogenesis. *Curr Biol* **13**:1571–82. doi:10.1016/j.cub.2003.08.030

606 Bharadwaj M, Strohmeyer N, Colo GP, Helenius J, Beerenwinkel N, Schiller HB, Fässler R, Müller  
607 DJ. 2017.  $\alpha$ V-class integrins exert dual roles on  $\alpha$ 5 $\beta$ 1 integrins to strengthen adhesion to  
608 fibronectin. *Nat Commun* **8**:14348. doi:10.1038/ncomms14348

609 Buchberger A, Seidl K, Klein C, Eberhardt H, Arnold HH. 1998. cMeso-1, a novel bHLH transcription

- 610 factor, is involved in somite formation in chicken embryos. *Dev Biol* **199**:201–15.  
611 doi:10.1006/dbio.1998.8919
- 612 Campbell ID, Humphries MJ. 2011. Integrin structure, activation, and interactions. *Cold Spring*  
613 *Harb Perspect Biol* **3**:a004994–a004994. doi:10.1101/cshperspect.a004994
- 614 Campos LS, Decker L, Taylor V, Skarnes W. 2006. Notch, epidermal growth factor receptor, and  
615 beta1-integrin pathways are coordinated in neural stem cells. *J Biol Chem* **281**:5300–9.  
616 doi:10.1074/jbc.M511886200
- 617 Chan CJ, Heisenberg C-P, Hiiragi T. 2017. Coordination of morphogenesis and cell-fate specification  
618 in development. *Curr Biol* **27**:R1024–R1035. doi:10.1016/j.cub.2017.07.010
- 619 Chapman SC, Collignon J, Schoenwolf GC, Lumsden A. 2001. Improved method for chick whole-  
620 embryo culture using a filter paper carrier. *Dev Dyn* **220**:284–9. doi:10.1002/1097-  
621 0177(20010301)220:3<284::AID-DVDY1102>3.0.CO;2-5
- 622 Chernoff EA, Hilfer SR. 1982. Calcium dependence and contraction in somite formation. *Tissue Cell*  
623 **14**:435–49. doi:10.1016/0040-8166(82)90038-6
- 624 Christ B, Huang R, Scaal M. 2007. Amniote somite derivatives. *Dev Dyn* **236**:2382–2396.  
625 doi:10.1002/dvdy.21189
- 626 Cosgrove BD, Mui KL, Driscoll TP, Caliarì SR, Mehta KD, Assoian RK, Burdick JA, Mauck RL. 2016. N-  
627 cadherin adhesive interactions modulate matrix mechanosensing and fate commitment of  
628 mesenchymal stem cells. *Nat Mater* **15**:1297–1306. doi:10.1038/nmat4725
- 629 Daley WP, Kohn JM, Larsen M. 2011. A focal adhesion protein-based mechanochemical checkpoint  
630 regulates cleft progression during branching morphogenesis. *Dev Dyn* **240**:2069–2083.  
631 doi:10.1002/dvdy.22714
- 632 Danen EHJ, Sonneveld P, Brakebusch C, Fässler R, Sonnenberg A. 2002. The fibronectin-binding

- 633 integrins  $\alpha 5\beta 1$  and  $\alpha v\beta 3$  differentially modulate RhoA-GTP loading, organization of cell  
634 matrix adhesions, and fibronectin fibrillogenesis. *J Cell Biol* **159**:1071–1086.  
635 doi:10.1083/jcb.200205014
- 636 Dequéant M-L, Glynn E, Gaudenz K, Wahl M, Chen J, Mushegian A, Pourquié O. 2006. A complex  
637 oscillating network of signaling genes underlies the mouse segmentation clock. *Science*  
638 **314**:1595–8. doi:10.1126/science.1133141
- 639 Drake CJ, Davis LA, Hungerford JE, Little CD. 1992. Perturbation of beta 1 integrin-mediated  
640 adhesions results in altered somite cell shape and behavior. *Dev Biol* **149**:327–38.  
641 doi:10.1016/0012-1606(92)90288-R
- 642 Drake CJ, Little CD. 1991. Integrins play an essential role in somite adhesion to the embryonic axis.  
643 *Dev Biol* **143**:418–21. doi:10.1016/0012-1606(91)90092-H
- 644 George EL, Georges-Labouesse EN, Patel-King RS, Rayburn H, Hynes RO. 1993. Defects in  
645 mesoderm, neural tube and vascular development in mouse embryos lacking fibronectin.  
646 *Development* **119**:1079–1091. PMID: 8306876.
- 647 Georges-Labouesse EN, George EL, Rayburn H, Hynes RO. 1996. Mesodermal development in  
648 mouse embryos mutant for fibronectin. *Dev Dyn* **207**:145–56. doi:10.1002/(SICI)1097-  
649 0177(199610)207:2<145::AID-AJA3>3.0.CO;2-H
- 650 Girós A, Grgur K, Gossler A, Costell M. 2011.  $\alpha 5\beta 1$  integrin-mediated adhesion to fibronectin is  
651 required for axis elongation and somitogenesis in mice. *PLoS One* **6**:e22002.  
652 doi:10.1371/journal.pone.0022002
- 653 Goh KL, Yang JT, Hynes RO. 1997. Mesodermal defects and cranial neural crest apoptosis in alpha5  
654 integrin-null embryos. *Development* **124**:4309–4319. PMID: 9334279.
- 655 Gomes de Almeida P, Pinheiro GG, Nunes AM, Gonçalves AB, Thorsteinsdóttir S. 2016. Fibronectin  
656 assembly during early embryo development: A versatile communication system between

- 657 cells and tissues. *Dev Dyn* **245**:520–35. doi:10.1002/dvdy.24391
- 658 Gordon WR, Zimmerman B, He L, Miles LJ, Huang J, Tiyanont K, McArthur DG, Aster JC, Perrimon  
659 N, Loparo JJ, Blacklow SC. 2015. Mechanical Allostery: Evidence for a Force Requirement in  
660 the Proteolytic Activation of Notch. *Dev Cell* **33**:729–36. doi:10.1016/j.devcel.2015.05.004
- 661 Hamburger V, Hamilton HL. 1992. A series of normal stages in the development of the chick  
662 embryo. *Dev Dyn* **195**:231–272. doi:10.1002/aja.1001950404
- 663 Henrique D, Adam J, Myat A, Chitnis A, Lewis J, Ish-Horowicz D. 1995. Expression of a Delta  
664 homologue in prospective neurons in the chick. *Nature* **375**:787–790. doi:10.1038/375787a0
- 665 Hubaud A, Pourquié O. 2014. Signalling dynamics in vertebrate segmentation. *Nat Rev Mol Cell*  
666 *Biol* **15**:709–721. doi:10.1038/nrm3891
- 667 Hubaud A, Regev I, Mahadevan L, Pourquié O. 2017. Excitable dynamics and Yap-dependent  
668 mechanical cues drive the segmentation clock. *Cell* **171**:668–682.e11.  
669 doi:10.1016/j.cell.2017.08.043
- 670 Hunter GL, He L, Perrimon N, Charras G, Giniger E, Baum B. 2019. A role for actomyosin contractility  
671 in Notch signaling. *BMC Biol* **17**:12. doi:10.1186/s12915-019-0625-9
- 672 Jouve C, Palmeirim I, Henrique D, Beckers J, Gossler A, Ish-Horowicz D, Pourquié O. 2000. Notch  
673 signalling is required for cyclic expression of the hairy-like gene HES1 in the presomitic  
674 mesoderm. *Development* **127**:1421–1429. doi:10.1016/S0092-8674(00)80451-1
- 675 Jülich D, Cobb G, Melo AM, McMillen P, Lawton AK, Mochrie SGJ, Rhoades E, Holley SA. 2015.  
676 Cross-scale integrin regulation organizes ECM and tissue topology. *Dev Cell* **34**:33–44.  
677 doi:10.1016/j.devcel.2015.05.005
- 678 Jülich D, Geisler R, Holley SA, Tübingen 2000 Screen Consortium. 2005. Integrin $\alpha$ 5 and  
679 delta/notch signaling have complementary spatiotemporal requirements during zebrafish

- 680 somitogenesis. *Dev Cell* **8**:575–86. doi:10.1016/j.devcel.2005.01.016
- 681 Kocsis E, Trus BL, Steer CJ, Bisher ME, Steven AC. 1991. Image averaging of flexible fibrous  
682 macromolecules: the clathrin triskelion has an elastic proximal segment. *J Struct Biol* **107**:6–  
683 14. doi:10.1093/bioinformatics/btp184
- 684 Koshida S, Kishimoto Y, Ustumi H, Shimizu T, Furutani-Seiki M, Kondoh H, Takada S. 2005. Integrin  
685 alpha5-dependent fibronectin accumulation for maintenance of somite boundaries in  
686 zebrafish embryos. *Dev Cell* **8**:587–98. doi:10.1016/j.devcel.2005.03.006
- 687 Kragtorp KA, Miller JR. 2007. Integrin alpha5 is required for somite rotation and boundary  
688 formation in *Xenopus*. *Dev Dyn* **236**:2713–20. doi:10.1002/dvdy.21280
- 689 Lauschke VM, Tsiairis CD, François P, Aulehla A. 2013. Scaling of embryonic patterning based on  
690 phase-gradient encoding. *Nature* **493**:101–105. doi:10.1038/nature11804
- 691 Luca VC, Kim BC, Ge C, Kakuda S, Wu D, Roein-Peikar M, Haltiwanger RS, Zhu C, Ha T, Garcia KC.  
692 2017. Notch-Jagged complex structure implicates a catch bond in tuning ligand sensitivity.  
693 *Science (80- )* **355**:1320–1324. doi:10.1126/science.aaf9739
- 694 Marek M, Kubíček M. 1981. Morphogen pattern formation and development in growth. *Bull Math*  
695 *Biol* **43**:259–70.
- 696 Marrese M, Antonovaite N, Nelemans BKA, Smit TH, Iannuzzi D. 2019. Micro-indentation and  
697 optical coherence tomography for the mechanical characterization of embryos: Experimental  
698 setup and measurements on chicken embryos. *Acta Biomater.*  
699 doi:10.1016/j.actbio.2019.07.056
- 700 Martins GG, Rifes P, Amândio R, Rodrigues G, Palmeirim I, Thorsteinsdóttir S. 2009. Dynamic 3D  
701 cell rearrangements guided by a fibronectin matrix underlie somitogenesis. *PLoS One*  
702 **4**:e7429. doi:10.1371/journal.pone.0007429



- 703 Masamizu Y, Ohtsuka T, Takashima Y, Nagahara H, Takenaka Y, Yoshikawa K, Okamura H,  
704 Kageyama R. 2006. Real-time imaging of the somite segmentation clock: Revelation of  
705 unstable oscillators in the individual presomitic mesoderm cells. *Proc Natl Acad Sci*  
706 **103**:1313–1318. doi:10.1073/pnas.0508658103
- 707 McKeown-Longo PJ, Mosher DF. 1985. Interaction of the 70,000-mol-wt amino-terminal fragment  
708 of fibronectin with the matrix-assembly receptor of fibroblasts. *J Cell Biol* **100**:364–74.  
709 doi:10.1083/jcb.100.2.364
- 710 Meloty-Kapella L, Shergill B, Kuon J, Botvinick E, Weinmaster G. 2012. Notch Ligand Endocytosis  
711 Generates Mechanical Pulling Force Dependent on Dynamin, Epsins, and Actin. *Dev Cell*  
712 **22**:1299–1312. doi:10.1016/j.devcel.2012.04.005
- 713 Merle T, Farge E. 2018. Trans-scale mechanotransductive cascade of biochemical and  
714 biomechanical patterning in embryonic development: the light side of the force. *Curr Opin*  
715 *Cell Biol* **55**:111–118. doi:10.1016/j.ceb.2018.07.003
- 716 Morimoto M, Takahashi Y, Endo M, Saga Y. 2005. The Mesp2 transcription factor establishes  
717 segmental borders by suppressing Notch activity. *Nature* **435**:354–359.  
718 doi:10.1038/nature03591
- 719 Nakajima Y, Morimoto M, Takahashi Y, Koseki H, Saga Y. 2006. Identification of Epha4 enhancer  
720 required for segmental expression and the regulation by Mesp2. *Development* **133**:2517–25.  
721 doi:10.1242/dev.02422
- 722 Newell-Litwa KA, Horwitz R, Lamers ML. 2015. Non-muscle myosin II in disease: mechanisms and  
723 therapeutic opportunities. *Dis Model Mech* **8**:1495–515. doi:10.1242/dmm.022103
- 724 Niwa Y, Shimojo H, Isomura A, Gonzalez A, Miyachi H, Kageyama R. 2011. Different types of  
725 oscillations in Notch and Fgf signaling regulate the spatiotemporal periodicity of  
726 somitogenesis. *Genes Dev* **25**:1115–1120. doi:10.1101/gad.2035311

- 727 Palmeirim I, Dubrulle J, Henrique D, Ish-Horowicz D, Pourquié O. 1998. Uncoupling segmentation  
728 and somitogenesis in the chick presomitic mesoderm. *Dev Genet* **23**:77–85.  
729 doi:10.1002/(SICI)1520-6408(1998)23:1<77::AID-DVG8>3.0.CO;2-3
- 730 Palmeirim I, Henrique D, Ish-Horowicz D, Pourquié O. 1997. Avian hairy gene expression identifies  
731 a molecular clock linked to vertebrate segmentation and somitogenesis. *Cell* **91**:639–648.  
732 doi:10.1016/S0092-8674(00)80451-1
- 733 Pierschbacher MD, Ruoslahti E. 1984. Cell attachment activity of fibronectin can be duplicated by  
734 small synthetic fragments of the molecule. *Nature* **309**:30–3. PMID: 6325925.
- 735 Pourquié O, Tam PPL. 2001. A nomenclature for prospective somites and phases of cyclic gene  
736 expression in the presomitic mesoderm. *Dev Cell* **1**:619–20. doi:10.1016/S1534-  
737 5807(01)00082-X
- 738 Preibisch S, Saalfeld S, Tomancak P. 2009. Globally optimal stitching of tiled 3D microscopic image  
739 acquisitions. *Bioinformatics* **25**:1463–1465. doi:10.1093/bioinformatics/btp184
- 740 Prieto D, Aparicio G, Machado M, Zolessi FR. 2015. Application of the DNA-specific stain methyl  
741 green in the fluorescent labeling of embryos. *J Vis Exp* e52769. doi:10.3791/52769
- 742 Rallis C, Pinchin SM, Ish-Horowicz D. 2010. Cell-autonomous integrin control of Wnt and Notch  
743 signalling during somitogenesis. *Development* **137**:3591–3601. doi:10.1242/dev.050070
- 744 Rifés P, Carvalho L, Lopes C, Andrade RP, Rodrigues G, Palmeirim I, Thorsteinsdóttir S. 2007.  
745 Redefining the role of ectoderm in somitogenesis: a player in the formation of the fibronectin  
746 matrix of presomitic mesoderm. *Development* **134**:3155–3165. doi:10.1242/dev.003665
- 747 Rifés P, Thorsteinsdóttir S. 2012. Extracellular matrix assembly and 3D organization during paraxial  
748 mesoderm development in the chick embryo. *Dev Biol* **368**:370–381.  
749 doi:10.1016/j.ydbio.2012.06.003

- 750 Ringer P, Colo G, Fässler R, Grashoff C. 2017. Sensing the mechano-chemical properties of the  
751 extracellular matrix. *Matrix Biol* **64**:6–16. doi:10.1016/j.matbio.2017.03.004
- 752 Saga Y. 2012. The mechanism of somite formation in mice. *Curr Opin Genet Dev* **22**:331–338.  
753 doi:10.1016/j.gde.2012.05.004
- 754 Saga Y, Takeda H. 2001. The making of the somite: molecular events in vertebrate segmentation.  
755 *Nat Rev Genet* **2**:835–845. doi:10.1038/35098552
- 756 Sato Y, Nagatoshi K, Hamano A, Imamura Y, Huss D, Uchida S, Lansford R. 2017. Basal filopodia and  
757 vascular mechanical stress organize fibronectin into pillars bridging the mesoderm-  
758 endoderm gap. *Development* **144**:281–291. doi:10.1242/dev.141259
- 759 Sato Y, Yasuda K, Takahashi Y. 2002. Morphological boundary forms by a novel inductive event  
760 mediated by Lunatic fringe and Notch during somitic segmentation. *Development* **129**:3633–  
761 44. PMID: 12117813.
- 762 Schiller HB, Hermann M-R, Polleux J, Vignaud T, Zanivan S, Friedel CC, Sun Z, Raducanu A,  
763 Gottschalk K-E, Théry M, Mann M, Fässler R. 2013.  $\beta$ 1- and  $\alpha$ v-class integrins cooperate to  
764 regulate myosin II during rigidity sensing of fibronectin-based microenvironments. *Nat Cell*  
765 *Biol* **15**:625–636. doi:10.1038/ncb2747
- 766 Shih NP, François P, Delaune EA, Amacher SL. 2015. Dynamics of the slowing segmentation clock  
767 reveal alternating two-segment periodicity. *Development* **142**:1785–93.  
768 doi:10.1242/dev.119057
- 769 Slack JMW. 1987. We have a morphogen! *Nature* **327**:553–554. doi:10.1038/327553a0
- 770 Smutny M, Ákos Z, Grigolon S, Shamipour S, Ruprecht V, Čapek D, Behrndt M, Papisheva E, Tada  
771 M, Hof B, Vicsek T, Salbreux G, Heisenberg CP. 2017. Friction forces position the neural  
772 anlage. *Nat Cell Biol* **19**:306–317. doi:10.1038/ncb3492

- 773 Straight AF, Cheung A, Limouze J, Chen I, Westwood NJ, Sellers JR, Mitchison TJ. 2003. Dissecting  
774 temporal and spatial control of cytokinesis with a myosin II Inhibitor. *Science* **299**:1743–7.  
775 doi:10.1126/science.1081412
- 776 Takahashi S, Leiss M, Moser M, Ohashi T, Kitao T, Heckmann D, Pfeifer A, Kessler H, Takagi J,  
777 Erickson HP, Fässler R. 2007. The RGD motif in fibronectin is essential for development but  
778 dispensable for fibril assembly. *J Cell Biol* **178**:167–178. doi:10.1083/jcb.200703021
- 779 Takahashi Y, Inoue T, Gossler A, Saga Y. 2003. Feedback loops comprising Dll1, Dll3 and Mesp2,  
780 and differential involvement of Psen1 are essential for rostrocaudal patterning of somites.  
781 *Development* **130**:4259–68. doi:10.1242/dev.00629
- 782 Takahashi Y, Koizumi K, Takagi A, Kitajima S, Inoue T, Koseki H, Saga Y. 2000. Mesp2 initiates somite  
783 segmentation through the Notch signalling pathway. *Nat Genet* **25**:390–6.  
784 doi:10.1038/78062
- 785 Tiedemann H. 1976. Pattern formation in early developmental stages of amphibian embryos. *J*  
786 *Embryol Exp Morphol* **35**:437–44. PMID: 781172.
- 787 Torr EE, Ngam CR, Bernau K, Tomasini-Johansson B, Acton B, Sandbo N. 2015. Myofibroblasts  
788 exhibit enhanced fibronectin assembly that is intrinsic to their contractile phenotype. *J Biol*  
789 *Chem* **290**:6951–61. doi:10.1074/jbc.M114.606186
- 790 Watanabe T, Sato Y, Saito D, Tadokoro R, Takahashi Y. 2009. EphrinB2 coordinates the formation  
791 of a morphological boundary and cell epithelialization during somite segmentation. *Proc Natl*  
792 *Acad Sci* **106**:7467–7472. doi:10.1073/pnas.0902859106
- 793 Wolfenson H, Lavelin I, Geiger B. 2013. Dynamic regulation of the structure and functions of  
794 integrin adhesions. *Dev Cell* **24**:447–58. doi:10.1016/j.devcel.2013.02.012
- 795 Wolfenson H, Meacci G, Liu S, Stachowiak MR, Iskratsch T, Ghassemi S, Roca-Cusachs P,  
796 O’Shaughnessy B, Hone J, Sheetz MP. 2016. Tropomyosin controls sarcomere-like

- 797           contractions for rigidity sensing and suppressing growth on soft matrices. *Nat Cell Biol* **18**:33–  
798           42. doi:10.1038/ncb3277
- 799   Yang JT, Bader BL, Kreidberg J a, Ullman-Culleré M, Trevithick JE, Hynes RO. 1999. Overlapping and  
800           independent functions of fibronectin receptor integrins in early mesodermal development.  
801           *Dev Biol* **215**:264–77. doi:10.1006/dbio.1999.9451
- 802   Yang JT, Rayburn H, Hynes RO. 1993. Embryonic mesodermal defects in alpha 5 integrin-deficient  
803           mice. *Development* **119**:1093–105. PMID: 781172.
- 804   Yarrow JC, Totsukawa G, Charras GT, Mitchison TJ. 2005. Screening for cell migration inhibitors via  
805           automated microscopy reveals a Rho-kinase inhibitor. *Chem Biol* **12**:385–95.  
806           doi:10.1016/j.chembiol.2005.01.015
- 807

808 **Supplementary Figures**

809

810

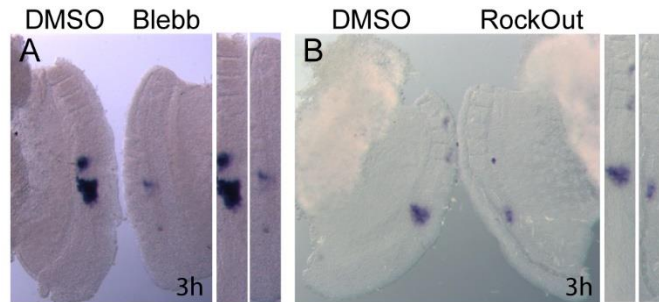

811

812

813 **Supplementary Figure 1. Blocking NM II or ROCK I/II activity for 3 hours leads to altered *meso1* expression.**

814 **(A, B)** *meso1* expression evaluated by *in situ* hybridization in explants treated for 3 hours with Blebbistatin

815 **(A)** or RockOut **(B)** and in the respective contralateral controls, shows that *meso1* expression is already

816 altered two clock cycles after adding the drugs. Straightened images of the respective explant pairs (right)

817 were aligned by SIV. Rostral is on top.

818

819

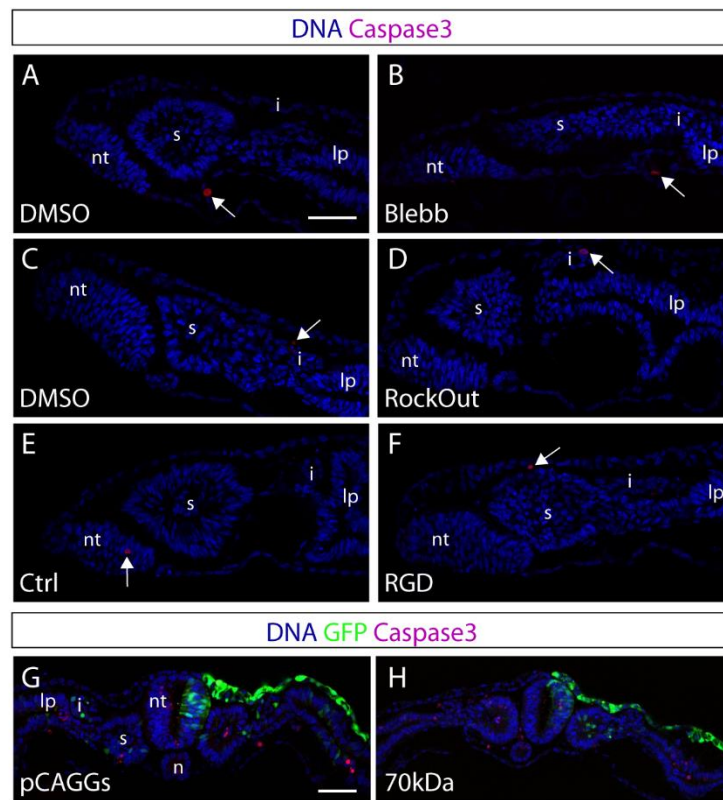

820

821 **Supplementary Figure 2. Apoptosis is not enhanced in the experimental culture conditions used.**

822 **(A, H)** Immunostaining for activated Caspase3 in transverse sections of control and contralateral explants  
823 treated with either Blebbistatin **(A, B)**, RockOut **(C, D)**, or RGD **(E, F)** for 6 hours, and in pCAGGs- and 70kDa-  
824 electroporated embryos **(G, H)**. DNA (blue), activated Caspase3 (magenta) and GFP (green). Arrows indicate  
825 Caspase3-positive cells. Apoptosis levels are not increased by any of the treatments. Blebb – Blebbistatin;  
826 nt – neural tube; s – somite; i – intermediate mesoderm; lp – lateral plate mesoderm. Dorsal is on top. Scale  
827 bars: 50 μm.

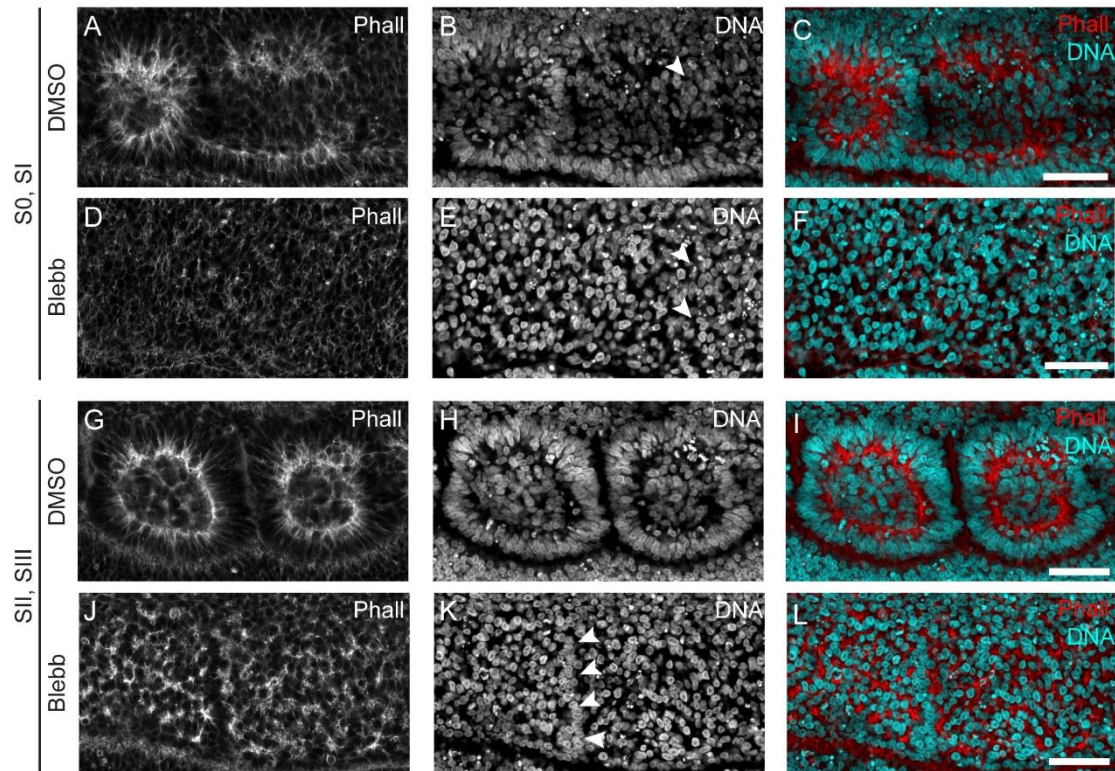

828

829

**Supplementary Figure 3. NM II inhibition impairs F-actin apical enrichment and nuclear alignment in somites formed during culture.**

830

831 **(A, L)** Sagittal sections of DMSO-treated explants (A-C, G-I) and contralateral Blebbistatin-treated explants  
832 (D-F, J-L) stained for F-actin and DNA. Rostral PSM epithelialization of DMSO-treated explants occurs  
833 normally, with F-actin apical enrichment (A) and nuclear alignment (B) in S0 and S1. At the same axial level  
834 in the contralateral Blebbistatin-treated explant (D-F), F-actin staining is dispersed (D) and nuclei do not align  
835 (E). SII and SIII of DMSO-treated explants are epithelial (G-I), composed of an outer cell layer with aligned  
836 nuclei (H) and elongated cells with apically enriched F-actin (G). At the equivalent axial level in the  
837 Blebbistatin-treated explant (J-L), the somitic segments were severely affected. There is only a slight nuclear  
838 alignment at the prospective inter-somitic border (K, arrowheads) and F-actin aggregates into dispersed and  
839 separate foci (J, L). Rostral to the left and dorsal on top. Blebb – Blebbistatin; Phall – phalloidin F-actin  
840 staining. Scale bars: 50  $\mu$ m.



### Neural Tube

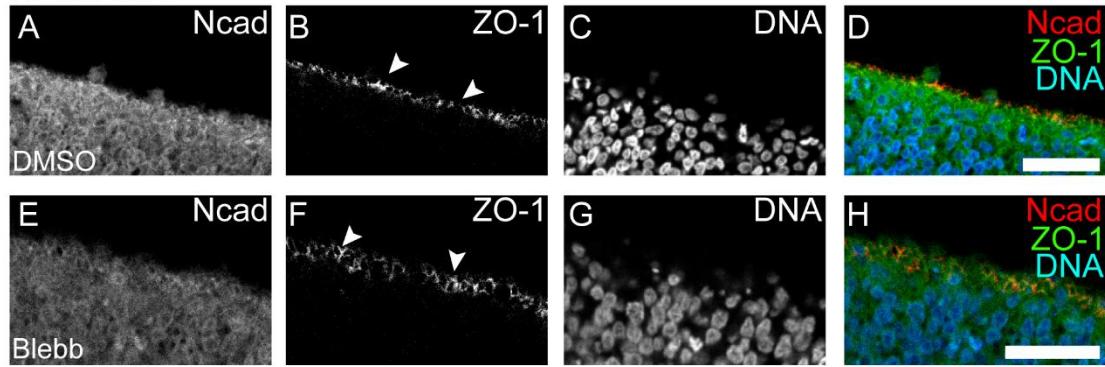

### Ectoderm

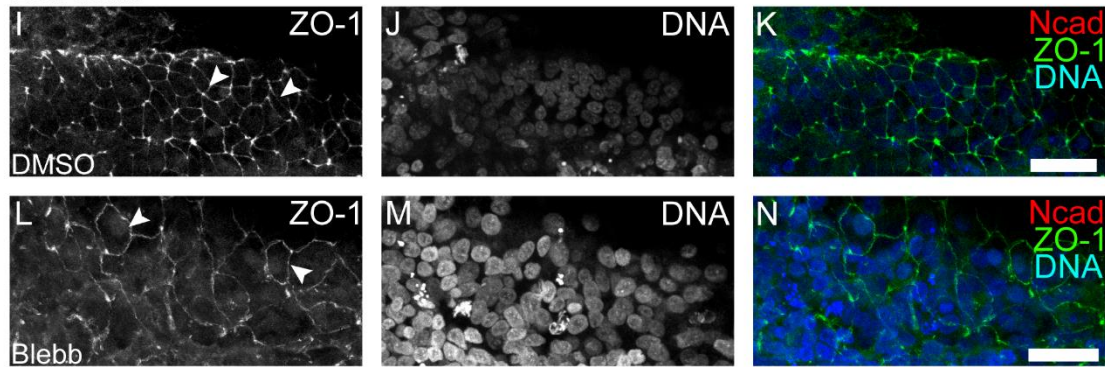

841

842

843

844

845

846

847

848

849

**Supplementary Figure 4. Epithelial structure of the neural tube and ectoderm are unaffected by NM II inhibition.**

**(A, N)** Control explants (A-D and I-K) showed strong apically located ZO-1 labeling (B, I, arrowheads) both in the neural tube (A-D; transverse optical section, medial on top) and in the overlying surface ectoderm (I-K; dorsal view of ectoderm). In the presence of Blebbistatin (E-H, L-N), ZO-1 labeling remained restricted to the apical end of neural tube cells (F, arrowheads) and of surface ectoderm cells (L, arrowheads). Blebb – Blebbistatin; Ncad – N-cadherin. ZO-1 – *Zonula occludens* protein 1. Arrowheads point to ZO-1 labeling. Scale bars: 20  $\mu$ m.

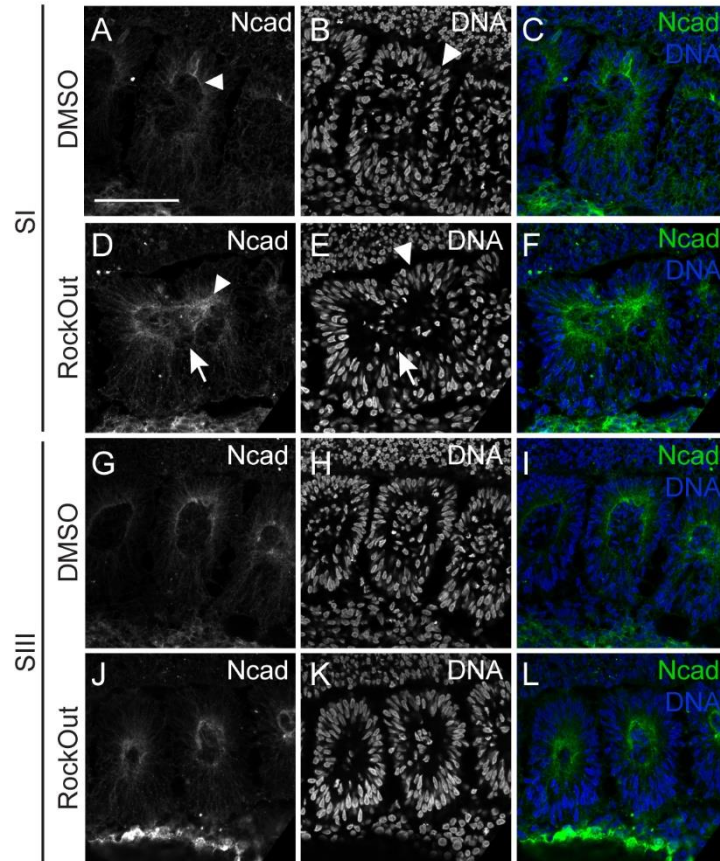

850

851 **Supplementary Figure 5. ROCK I/II inhibition impairs apical polarization of N-cadherin in nascent somites.**

852 **(A, L)** Longitudinal views of explants cultured for 6 hours in control (DMSO) medium (A-C, G-I) and their  
853 contralateral RockOut-treated halves (D-F, J-L) at SI (A-F) and SIII (G-L) levels, immunostained for N-cadherin  
854 (first column) and stained for DNA (second column). Third column shows the respective merge of all  
855 stainings. SI in control explants shows normal accumulation of N-cadherin (A, arrowhead) and nuclear  
856 alignment (B, arrowhead). In contrast, SI in contralateral RockOut-treated explants fail to form a clear cleft  
857 (D-F, arrows) leading to partially fused somites. N-cadherin is, however, partially polarized (D, arrowhead)  
858 and nuclei are aligned (E, arrowhead). At SIII level, both explants show normal N-cadherin polarization (G, J)  
859 and nuclear alignment (H, L). Rostral on the left and midline on top. Ncad - N-cadherin. Scale bars: 50  $\mu$ m.

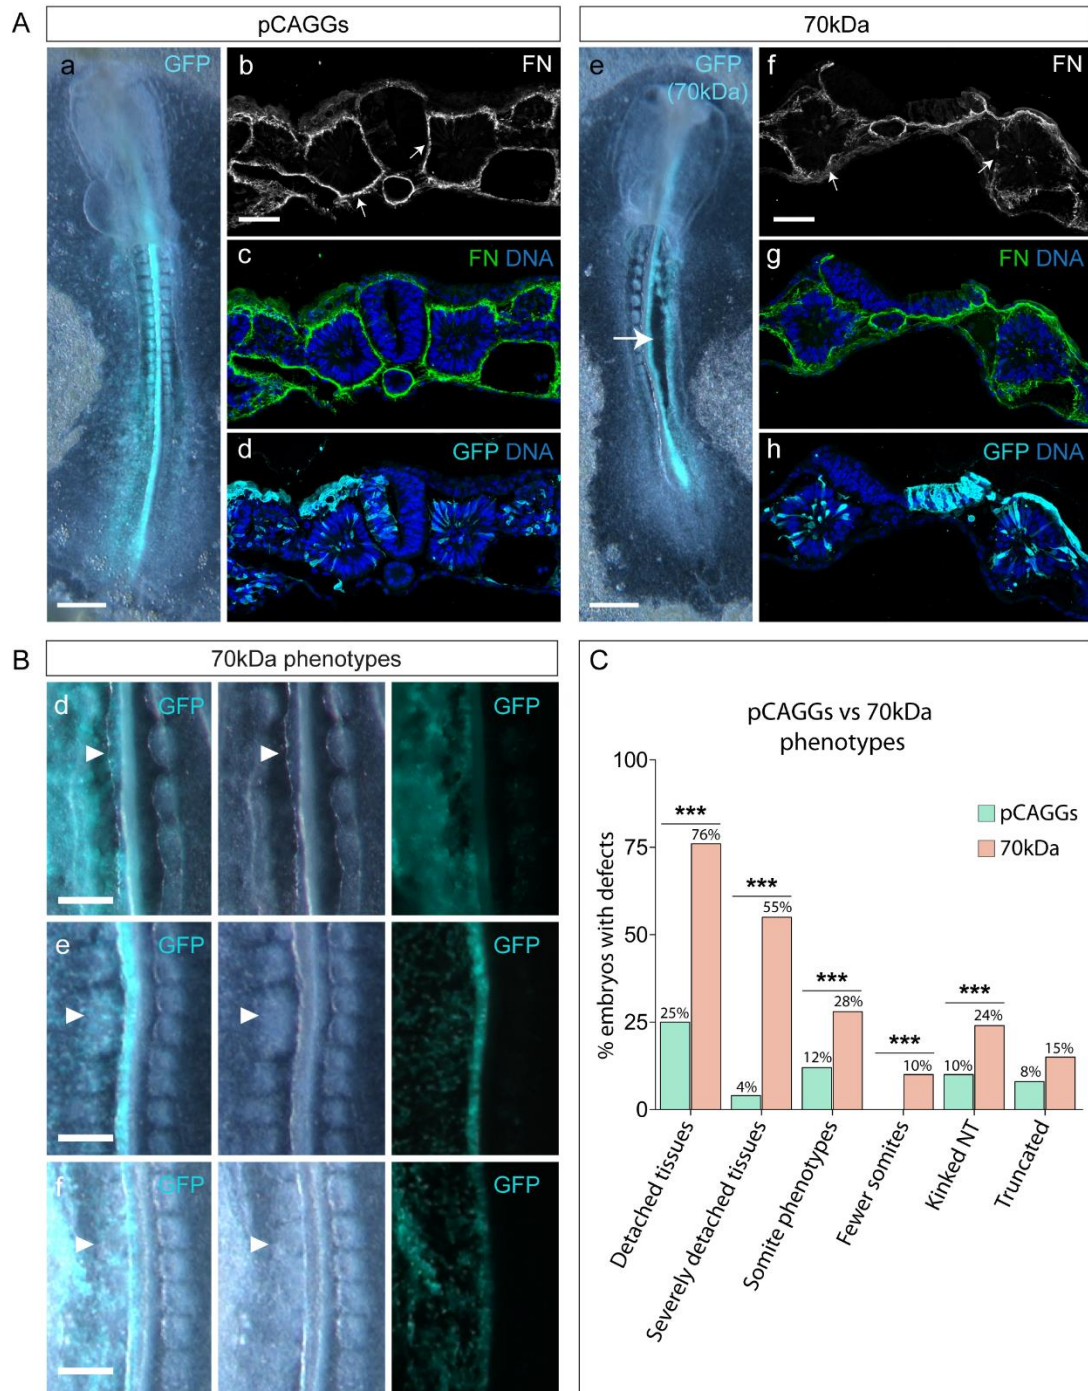

860

861 **Supplementary Figure 6. Embryos electroporated with the 70kDa construct exhibit numerous**  
 862 **morphological defects.**

863 **(A)** Representative images of the morphology of embryos electroporated with either pCAGGs only (a) or  
 864 70kDa, the latter being a severe phenotype (e). Severe phenotypes included severely detached tissues (e,  
 865 arrow) and a truncated A-P axis. Transverse sections of pCAGGs- (b-d) and 70kDa-electroporated embryos  
 866 (f-h) immunostained for fibronectin (b-c, f-g), GFP (d, h) and stained for DNA (c-d, g-h). Electroporated side  
 867 is on left (a-d) or right (e-h). Detachment of tissues is clearly visible in 70kDa-electroporated embryos (e),  
 868 which is accompanied by a severe disruption in the fibronectin matrix (compare b-c with f-g, arrows). **(B)**  
 869 Close up of embryos electroporated with 70kDa showing kinked neural tube (d, arrowheads), fused somites  
 870 (e, arrowheads) and fewer somites on the electroporated side (f, arrowheads). Electroporated sides are on  
 871 left. Ventral view and rostral on top. **(C)** Percentage of pCAGGS- (green bars) and 70kDa-electroporated (pink

872 bars) embryos with morphological defects, including detached (pCAGGs: 39/154, 70kDa: 97/144) and  
873 severely detached tissues (pCAGGs: 6/154, 70kDa: 79/144), kinked neural tube (pCAGGs: 15/154, 70kDa:  
874 34/144), truncated A-P axis (pCAGGs: 13/154, 70kDa: 21/144), abnormal somite morphology (pCAGGs:  
875 18/154, 70kDa: 41/144), and fewer somites on the electroporated side compared to the control non-  
876 electroporated side (pCAGGs: 0/154, 70kDa: 15/144). \*\*\* $p < 0.001$ . FN – fibronectin. Scale bars: (A, a, e; C,  
877 a-c) 500  $\mu\text{m}$ , (C, d-f) 200  $\mu\text{m}$ , (A, b-d, f-h) 50  $\mu\text{m}$ .

878

Length and width of SI and SV of non-electroporated side vs of pCAGGs/70kDa side

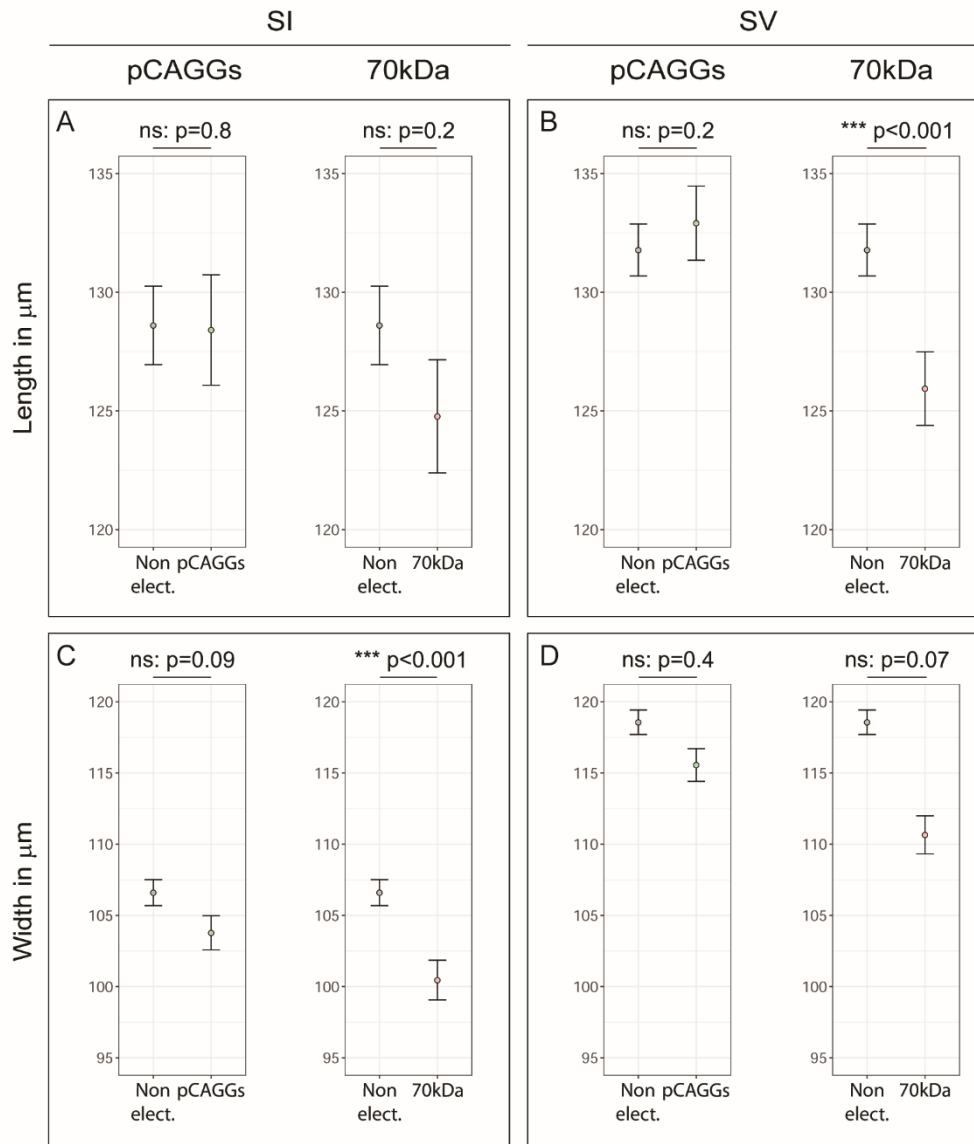

879

880 **Supplementary Figure 7. Quantification of somite length and width in pCAGGs- and 70kDa-electroporated**  
 881 **embryos.**

882 **(A-D)** Length of SI (A) and SV (B) and width of SI (C) and SV (D) from pCAGGS- and 70kDa-electroporated  
 883 embryos compared to the control non-electroporated side. The measurements were made on images from  
 884 whole mount embryos. Somites from pCAGGs-electroporated embryos did not show a significant difference  
 885 in either length or width between electroporated vs non-electroporated sides (n=151), but the width of SI  
 886 and length of SV of the electroporated side of 70kDa-treated embryos were significantly smaller than that  
 887 of the contralateral non-electroporated control side (n=143). Bars represent the standard error of the mean.  
 888 ns – not significant; \*\*\* p<0.001.
